---

# A DOPAMINE GRADIENT CONTROLS ACCESS TO DISTRIBUTED WORKING MEMORY IN MONKEY CORTEX

---

A PREPRINT

Sean Froudist-Walsh<sup>1</sup>, Daniel P. Bliss<sup>1</sup>, Xingyu Ding<sup>1</sup>, Lucija Jankovic-Rapan<sup>2</sup>, Meiqi Niu<sup>2</sup>, Kenneth Knoblauch<sup>3,4</sup>,  
Karl Zilles<sup>2</sup>, Henry Kennedy<sup>3,4</sup>, Nicola Palomero-Gallagher<sup>2</sup>, and Xiao-Jing Wang<sup>1,\*</sup>

<sup>1</sup>Center for Neural Science, New York University, New York, NY 10003, USA

<sup>2</sup>Research Center Jülich, INM-1, Jülich, Germany

<sup>3</sup>INSERM U846, Stem Cell & Brain Research Institute, 69500 Bron, France

<sup>4</sup>Université de Lyon, Université Lyon I, 69003 Lyon, France

\*lead contact: xjwang@nyu.edu

September 7, 2020

## 1 **Summary**

2 Dopamine is critical for working memory. However, its effects throughout the large-scale primate cortex are poorly  
3 understood. Here we report that dopamine receptor density per neuron, measured by receptor autoradiography in the  
4 macaque monkey cortex, displays a macroscopic gradient along the cortical hierarchy. We developed a connectome-  
5 and biophysically-based model for distributed working memory that incorporates multiple neuron types and a dopamine  
6 gradient. The model captures an inverted U-shaped dependence of working memory on dopamine. The spatial  
7 distribution of mnemonic persistent activity matches that observed in over 90 experimental studies. We show that  
8 dopamine filters out irrelevant stimuli by enhancing inhibition of pyramidal cell dendrites. The level of cortical  
9 dopamine can also determine whether memory encoding is through persistent activity or an internal synaptic state.  
10 Taken together, our work represents a cross-level understanding that links molecules, cell types, recurrent circuit  
11 dynamics and a core cognitive function distributed across the cortex.

12 **Keywords** Dopamine · Working Memory · Large-scale brain model · inhibitory circuit · parvalbumin · somatostatin ·  
13 VIP · interneurons

## 14 **Introduction**

15 Our ability to think through difficult problems without distraction is a hallmark of cognition. When faced with a  
16 constant stream of information, we must keep certain information in mind and protect it from distraction. For instance,

17 while following a conversation, it is important to focus on and remember the words that you are listening to, while  
18 ignoring other sights and sounds around you. This brain function is called working memory. The underlying neural  
19 representation engages information-specific persistent neural activity which is internally sustained in the absence of  
20 external stimulation across multiple cortical and subcortical areas (Christophel et al. 2017; Courtney et al. 1997; Dotson  
21 et al. 2018; Funahashi et al. 1989; Fuster 1973; Guo et al. 2017; Kamiński and Rutishauser 2020; Konecky et al. 2017;  
22 Leavitt et al. 2017; Romo et al. 1999; Wang 2001; Warden and Miller 2010).

23 Working memory and the prefrontal cortex are under the influence of monoaminergic modulation (Robbins and Arnsten  
24 2009). In fact, depletion of dopamine from the prefrontal cortex causes working memory deficits as severe as those  
25 seen by lesioning the prefrontal cortex (Brozoski et al. 1979). Dopamine neurons fire in response to stimuli that predict  
26 reward, but do not fire persistently during the delay period of working memory tasks (Cohen et al. 2012; Schultz  
27 et al. 1993). How might dopamine affect working memory if dopaminergic neurons do not fire during the delay?  
28 After dopamine neurons fire, dopamine is released, and dopamine levels remain elevated in the cortex for hundreds  
29 of milliseconds to tens of seconds, before being slowly cleared away (Cass and Gerhardt 1995; Garris and Wightman  
30 1994; Muller et al. 2014; Mundorf et al. 2001). Prefrontal neuron activity during working memory depends on precise  
31 levels of activation of the dopamine D1 receptors, with both too little and too much D1 receptor stimulation disrupting  
32 delay period activity (Vijayraghavan et al. 2007; Wang et al. 2019; Williams and Goldman-Rakic 1995).

33 Experimental and modelling studies of dopamine on persistent activity in working memory have focused on isolated  
34 local brain regions, generally in the lateral prefrontal cortex (Brunel and Wang 2001; Durstewitz et al. 2000; Jacob  
35 et al. 2016; Vijayraghavan et al. 2016, 2007; Wang et al. 2019; Williams and Goldman-Rakic 1995), where it has  
36 been shown that dopamine can enhance persistent activity through its effects on the NMDA and GABA receptors  
37 (Seamans et al. 2001a,b; Seamans and Yang 2004; Wang et al. 2013). If the effects of dopamine are truly restricted  
38 to small areas of cortex, then dopamine seems unlikely to be able to engage the widespread distributed activity seen  
39 during active working memory. If dopamine could enable persistent activity across large parts of cortex, then firing  
40 of dopamine neurons in response to behaviourally relevant stimuli could be a candidate mechanism to engage active  
41 working memory.

42 In spite of progress, our understanding remains far from complete. In this work, we tackled two open questions.  
43 First, how does dopamine modulate working memory across a multi-regional large-scale cortical system? Dopamine  
44 modulates neural activity through its receptors, of which the D1 receptor is the most common in cortex. The density of  
45 D1 receptors is known only for small sections of monkey cortex (Goldman-Rakic et al. 1990; Impieri et al. 2019; Lidow  
46 et al. 1991; Niu et al. 2020; Richfield et al. 1989). A detailed map of the density of D1 receptors across cortex would  
47 clarify the degree to which dopamine's influence on cortical processing is restricted to specific sections of cortex, or  
48 distributed throughout cortical systems.

49 Second, does dopamine contribute to robust working memory against distractors by virtue of differential impacts on  
50 different cell types? Drugs that promote synthesis or prevent reuptake of dopamine at the synapse make working  
51 memory less vulnerable to distracting stimuli (Fallon et al. 2017, 2016), and D1-agonists and antagonists determine how  
52 strongly neurons in prefrontal cortex encode distractor stimuli (Jacob et al. 2016). An early theoretical study proposed  
53 that inhibition targeted more strongly towards the dendrites, and away from the soma of pyramidal cells could increase  
54 the resistance of working memory to distraction (Wang et al. 2004a). Distinct inhibitory cell types primarily focus

55 their inhibition on the dendrites or soma of pyramidal cells, or on other inhibitory neurons (Adesnik et al. 2012; Jiang  
56 et al. 2015; Pfeffer et al. 2013; Tremblay et al. 2016). One intriguing possibility is that dopamine may shift the balance  
57 between distinct types of inhibitory neurons in order to keep distracting information from working memory.

58 We first set out to examine whether dopamine D1 receptor densities across cortex represent random heterogeneity, or  
59 a systematic gradient of receptor expression. Using in-vitro autoradiography, we measured the density of dopamine  
60 D1 receptors across 109 areas of macaque cortex. We found a systematic gradient of D1 receptors, that increased  
61 along the cortical hierarchy and peaked in frontal and parietal cortices. We then built a large-scale computational  
62 model of macaque cortex that is endowed with multiple cell types and is capable of performing working memory tasks.  
63 Interactions between multiple cell types across cortex were modulated by the density of dopamine D1 receptor receptors,  
64 and constrained by retrograde tract-tracing data. We investigated whether dopamine could ignite active working  
65 memory representations across frontal and parietal cortex given the measured pattern of D1 receptor receptors and  
66 cortico-cortical connections. We found that sufficient dopamine release in the model led to persistent working memory  
67 activity throughout the cortex that closely matched experimentally observed mnemonic activity in nearly 20 cortical  
68 areas in macaque monkeys. Stimuli that evoked too little or too much dopamine release could still be remembered, but  
69 stored in an internal synaptic state instead of persistent neural firing, consistent with an activity-silent scenario (Rose  
70 et al. 2016; Stokes 2015; Wolff et al. 2017). In this case, however, memories were more vulnerable to distractions.  
71 Appropriate dopamine release in response to relevant and distracting stimuli could be learned through reinforcement.  
72 Our model simulations suggest that dopamine may render memories robust to distraction by altering interactions  
73 between distinct types of inhibitory cells, blocking external stimuli from entering frontal cortex and promoting recurrent  
74 excitatory activity. Together, our results uncover a macroscopic gradient of dopamine D1 receptor distribution and  
75 elucidate how differential dopamine actions on different cell types ensure distractor-resistant working memory activity  
76 throughout primate cortex.

## 77 **Results**

### 78 **A hierarchical gradient of dopamine D1 receptors per neuron across monkey cortex**

79 To investigate how dopamine modulation may vary across cortical regions, we first analyzed D1 and D2 receptor  
80 distribution patterns throughout the macaque brain using in-vitro receptor autoradiography (Fig. S1; Supplementary  
81 Data). Autoradiography enables the quantification of endogenous receptors in the cell membrane through the use of  
82 radioactive ligands (Palomero-Gallagher and Zilles 2018). The highest densities (in fmol/mg protein) of both receptor  
83 types were found in the basal ganglia, with the caudate nucleus (D1  $298 \pm 28$ ; D2  $188 \pm 30$ ) and putamen (D1  $273 \pm 40$ ;  
84 D2  $203 \pm 37$ ) presenting considerably higher values than the internal (D1  $97 \pm 34$ ; D2  $22 \pm 12$ ) or external (D1  
85  $55 \pm 16$ ; D2  $30 \pm 11$ ) subdivisions of the globus pallidus. Cortical D1 receptor densities ranged from  $49 \pm 13$  fmol/mg  
86 protein in area 4a of the primary motor cortex to  $101 \pm 35$  fmol/mg protein in orbitofrontal area 111. We found a  
87 systematic gradient of D1 receptors across the 109 cytoarchitectonically identified cortical areas, whereby densities  
88 reached maximal values in areas of the frontal and parietal cortex (Fig. 1A). The density of the D2 receptor in cortex is  
89 so low that it is not detectable by means of the here applied method.

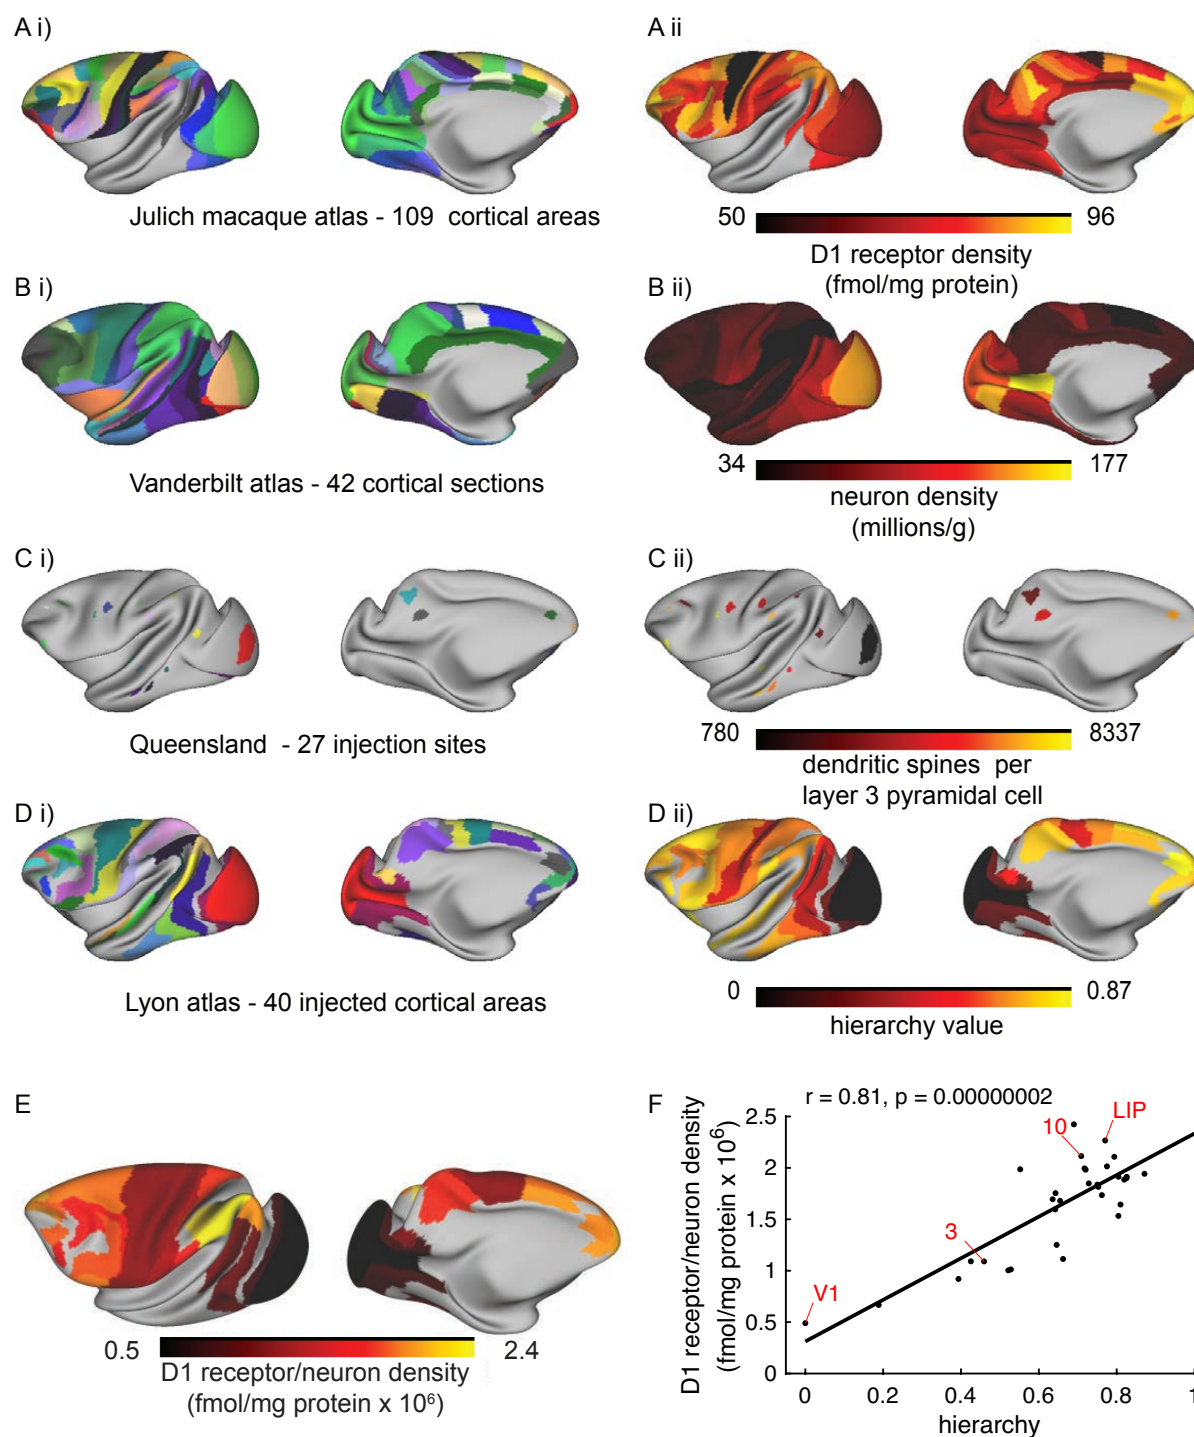

*Figure 1: A gradient of dopamine D1 receptors per neuron across monkey cortex. A i) 109 cortical regions were identified on the basis of receptor and cytoarchitecture to create the Jülich macaque atlas. Shown here mapped onto the Yerkes19 cortical surface. A ii) D1-receptor density is low in motor and sensory cortex, and relatively high in frontal and parietal cortex. Note that the receptor density shown here does not take into account differences in neuron density across areas. B i) Collins et al., (2010) divided the entire macaque cortex into 42 slabs of tissue, which we mapped onto the Yerkes19 surface. B ii) Neuron density across cortex. C i) Injection sites for the studies of dendritic spine density by Elston and colleagues, mapped onto the Yerkes19 surface. See main text for references. C ii) Number of dendritic spines on the basal dendrites of layer III pyramidal cells. D i) 40 injected areas in the retrograde tract-tracing database of Kennedy and colleagues (Markov et al. 2014b). D ii) Cortical hierarchy, calculated based on the laminar pattern of inter-areal connections. E) The density of D1 receptors divided by neuron density. Regions that have not yet been measured shown in gray. F) There was a strong positive correlation between the D1 receptor density per neuron and the cortical hierarchy, estimated independently based on the laminar origin of cortico-cortical connections. DIR, D1 receptor density.*

90 In order to compare the gradient of D1 receptors to other known gradients of anatomical organization in monkey cortex  
91 (Wang 2020), we carefully mapped the receptor data (Fig 1A), as well as data on neuronal density (Fig 1B) (Collins  
92 et al. 2010) and spine count (Fig 1C) (Elston 2000; Elston et al. 2001, 2005, 2011a, 2009, 2011b, 2010; Elston and  
93 Rockland 2002; Elston and Rosa 1997, 1998a,b; Elston et al. 1999) onto the Yerkes19 common cortical template, to  
94 which anatomical tract tracing data (Fig 1D i) has previously been mapped (Donahue et al. 2016).

95 In order to investigate a possible relationship between the pattern of D1 receptors and the cortical hierarchy, we  
96 estimated the latter using laminar connectivity data (Markov et al. 2014a). Feedforward connections tend to originate  
97 in the superficial cortical layers. In contrast, feedback connections usually originate in the deep layers (Barone et al.  
98 2000; Felleman and Van Essen 1991; Markov et al. 2014a). If two areas are at a similar level of the hierarchy, then the  
99 connections usually arise evenly from the superficial and deep layers (Barone et al. 2000; Markov et al. 2014a). This  
100 pattern allowed us to estimate the hierarchy of 40 areas in macaque cortex (Barone et al. 2000; Markov et al. 2014a)  
101 (Fig 1D ii). This expands previous estimates of the hierarchy based on 29 or 30 areas from the same database (Markov  
102 et al. 2014a; Mejias et al. 2016).

103 We divided the D1 receptor density by the neuron density (Collins et al. 2010) in order to give an estimate of the D1  
104 receptor density per neuron. D1 receptor density per neuron peaked in areas of frontal and parietal cortex, and was  
105 relatively low in early sensory cortex (Fig 1E). There was a strong positive correlation between the D1 receptor density  
106 per neuron and the cortical hierarchy (Fig 1F;  $r = 0.81, p = 2 \times 10^{-8}$ ).

### 107 **A local cortical circuit with three types of inhibitory neurons**

108 We built a model of a local cortical circuit which contains pyramidal cells and three types of inhibitory neurons (Fig  
109 2A). The cortical circuit is based on a disinhibitory motif (Wang and Yang 2018; Yang et al. 2016), which was originally  
110 predicted theoretically (Wang et al. 2004a), and has since received much experimental support (Adesnik et al. 2012;  
111 Jiang et al. 2015; Pfeffer et al. 2013; Tremblay et al. 2016). We have updated details of the connectivity structure to  
112 reflect recent experimental findings (Adesnik et al. 2012; Jiang et al. 2015; Pfeffer et al. 2013; Tremblay et al. 2016).  
113 We grouped the pyramidal neurons into two separate populations. Each of these populations is selective to a particular  
114 visual feature (such as a region of visual space). Pyramidal cells excite all cell types in the circuit, with different  
115 strengths. We model two compartments in the pyramidal cells. One compartment represents the soma and proximal  
116 dendrites, and the other the distal dendrites. The dendrite is modelled as a simplified nonlinear function, adapted from  
117 Yang et al. 2016. Pyramidal cells target the soma and proximal dendrites of other pyramidal cells in the same cortical  
118 area (Kalisman et al. 2005; Markram et al. 1997; Petreanu et al. 2009). Each type of inhibitory neuron has a unique  
119 pattern of connectivity. The first inhibitory cell type targets the perisomatic area of the pyramidal cells. These cells  
120 express parvalbumin (PV) and are fast spiking (Jiang et al. 2015; Kawaguchi 1993, 1995). They are basket cells with  
121 axons that branch across wide distances, which allows them to inhibit pyramidal cells in neighboring populations  
122 (Helmstaedter et al. 2009; Kawaguchi 1995). They also inhibit other PV neurons (Jiang et al. 2015; Pfeffer et al.  
123 2013). Compared to other inhibitory neurons, PV neurons receive a smaller proportion of excitatory inputs via NMDA  
124 receptors (Lu et al. 2007; Wang and Gao 2009). The second type of inhibitory neuron targets the distal dendrites of  
125 excitatory cells. In non-human primates, dendrite-targeting cells express calbindin (DeFelipe et al. 1989). The best  
126 characterised dendrite-targeting cell type in rodents is the Martinotti cell, which expresses somatostatin (SST/CB)

127 (Wang et al. 2004b). These cells target all other cell types, while avoiding other Martinotti cells (Jiang et al. 2015).  
128 They also receive a strong lateral projection from pyramidal cells in neighboring columns (Adesnik et al. 2012) and  
129 receive most of their excitation via NMDA receptors (Lu et al. 2007). The third type of interneuron expresses vasoactive  
130 intestinal peptide and calretinin (VIP/CR) (Tremblay et al. 2016) and targets SST/CB inhibitory neurons (Lee et al.  
131 2013).

### 132 **Dopamine modulates interactions between multiple cell types.**

133 In our model, dopamine acted by increasing the synaptic strength of inhibition to the dendrite, and reducing the synaptic  
134 strength of inhibition to the cell body (Fig 2B) (Gao et al. 2003). In addition, dopamine increased the strength of  
135 transmission via NMDA receptors (Seamans et al. 2001a). On the other hand, high stimulation of D1 receptors resulted  
136 increased adaptation in excitatory cells (potentially an M-current, via KCNQ potassium channels, Arnsten et al. 2019),  
137 mimicking the net inhibitory effect of high concentrations of D1-agonists.

### 138 **A large-scale model of macaque cortex incorporating multiple macroscopic gradients**

139 We then built a large-scale model of macaque cortex where the local circuit (Fig 2A, left) acted as a building block. We  
140 placed the local circuit in each of 40 cortical areas across macaque cortex (Fig 2A, right). However, these local circuits  
141 varied across areas in three key properties, namely long-distance connectivity, strength of excitation and modulation by  
142 D1 receptors. We defined the connections between areas using quantitative retrograde tract-tracing data (Markov et al.  
143 2014b). This data was collected in the same lab under the same conditions for injections into 40 distinct cortical areas.  
144 This offers high fidelity reconstruction of the weighted and directed connections between neurons in large sections of  
145 macaque cortex (Kennedy et al. 2013). In the model, long-range connections are excitatory and target the dendrites  
146 of pyramidal cells (Petreanu et al. 2009). Long-range excitatory connections also target VIP/CR cells to a greater  
147 degree than PV or SST/CB cells (Lee et al. 2013; Wall et al. 2016). The frontal eye fields (FEF - areas 8m and 8l in  
148 the Jülich and Lyon macaque atlases) have an unusually high density of calretinin (here VIP/CR) cells (Pouget et al.  
149 2009). To account for this, we increased the proportion of long-range input to VIP/CR cells in FEF and reduced the  
150 strength of input to the PV and SST/CB cells. We also increased the relative strength of local VIP/CR connections and  
151 reduced the relative strength of local PV connections in FEF, but found that this had no effect on model behaviour, so  
152 the simulations here are presented without the local changes in FEF.

153 The number of spines on the basal dendrites of layer III pyramidal neurons increases along the hierarchy (Chaudhuri et al.  
154 2015; Elston 2007). Approximately 90% of excitatory synapses on neocortical pyramidal cells are on dendritic spines  
155 (Nimchinsky et al. 2002). On this basis, we used the spine count to modulate the strength of excitatory connections  
156 across the cortex. The strength of dopamine modulation, as described in the previous section, depended both the global  
157 dopamine release and the local D1 receptor density across cortical areas.

### 158 **An inverted-U relationship between cortical D1 receptor stimulation and distributed working memory activity**

159 We simulated the large-scale cortical model during performance of the working memory task (Fig 2C) with different  
160 levels of dopamine release. Dopamine neurons fire bursts in response to stimuli predicting reward in working memory  
161 tasks (Schultz et al. 1993). Although striatal dopamine levels return to baseline relatively quickly following dopamine

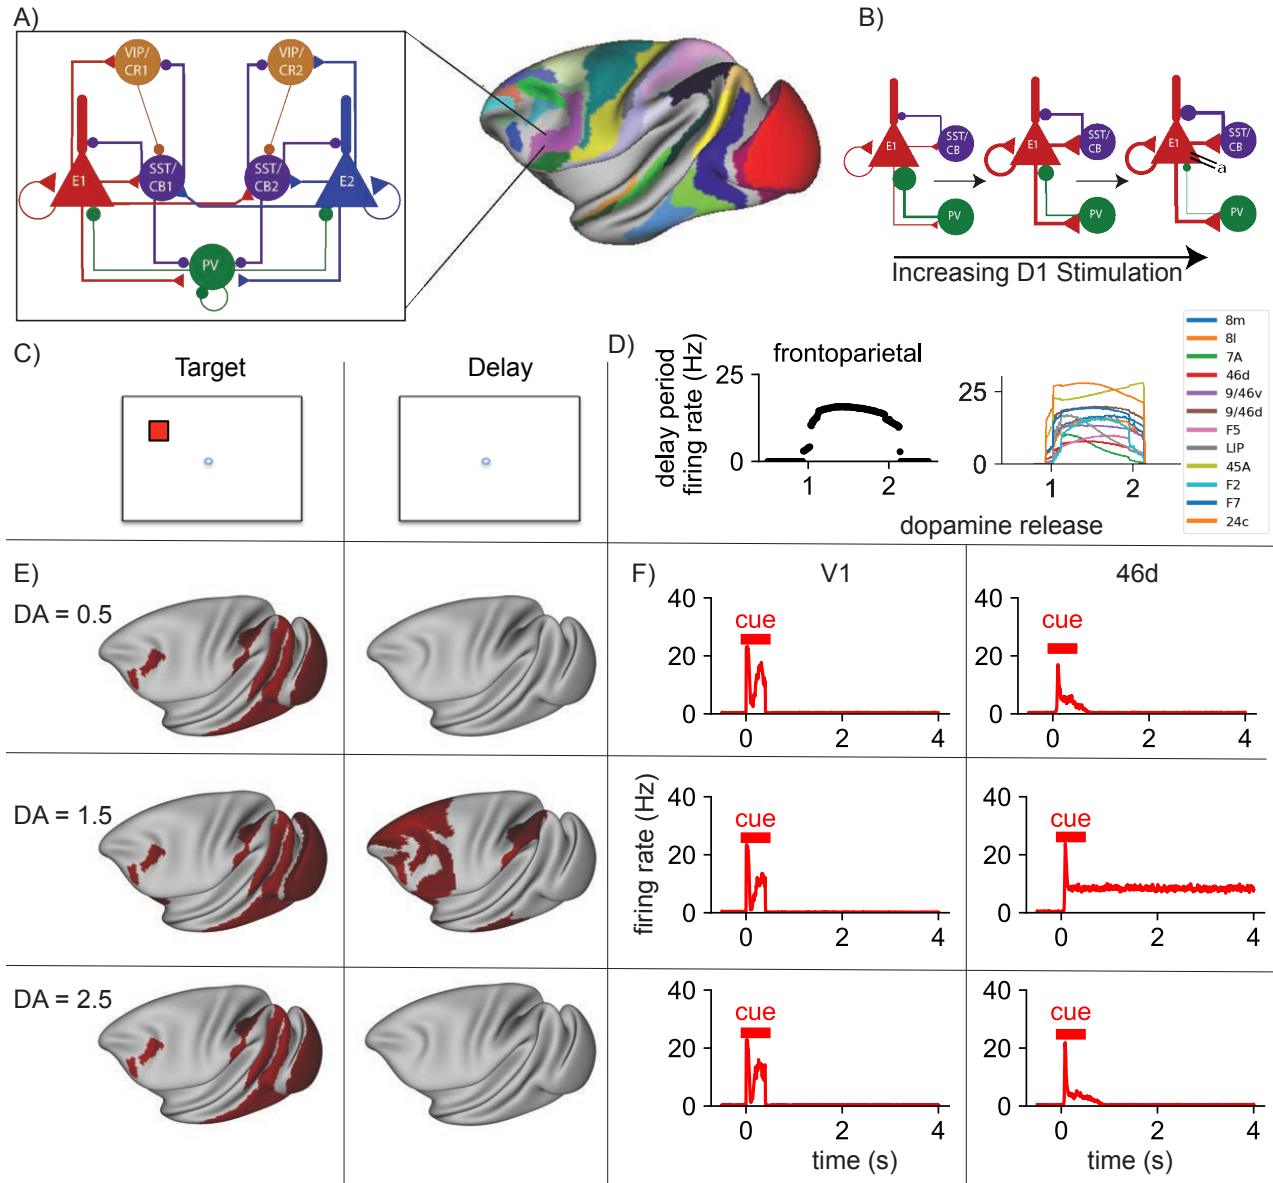

**Figure 2: An inverted-U relationship between D1 receptor stimulation and distributed frontoparietal delay-period activity.** *A*, left) Local circuit design. The circuit contains two populations of excitatory cells (red and blue), with each selective to a particular spatial location. The cell bodies (triangles) and dendrites (rectangles) are modeled as separate compartments. PV cells (green) inhibit the cell bodies of both excitatory populations. SST/CB cells (purple) inhibit the dendrites of the local excitatory population. VIP/CR cells (light brown) inhibit SST/CB cells. *A*, right) In order to construct the large-scale model, the local circuit in *A* is placed at each of 40 cortical locations (shown in colours). Cortical areas differ in three properties 1) the long-range connections, 2) the spine count and 3) the dopamine D1 receptor density. *B*) Stimulation of D1 receptors affects the cortical circuit in three ways 1) an increase of inhibition targeting the dendrites, with a corresponding decrease in inhibition to the soma of pyramidal cells, 2) an increase in NMDA-dependent excitatory transmission for low-to-medium levels of stimulation and 3) increasing adaptation for high levels of stimulation. *C*) Structure of the task. The cortical network was presented with a stimulus, which it had to maintain through a delay period. *D*, left) Mean firing rate in the frontoparietal network at the end of the delay period, for different levels of dopamine release. There is an inverted-U relationship between dopamine release and delay period activity across the frontoparietal network. *D*, right) Mean delay-period activity of cortical areas as a function of dopamine release. All areas shown display persistent activity in experiments (Leavitt et al. 2017). *E*) Activity is shown across the cortex at different stages in the working memory task (left to right), with increasing levels of dopamine release (from top to bottom). Red represents activity in the excitatory population sensitive to the location of the target stimulus. Very low or very high levels of dopamine release resulted in reduced propagation of stimulus-related activity to frontal areas and a failure to engage persistent activity. Mid-level dopamine release enables distributed persistent activity. *F*) Timecourses of activity in selected cortical areas. The horizontal bars indicate the timing of cue (red) input to area V1. Activity in early visual areas such as V1 peaks in response to the stimulus, but quickly decays away after stimulus removal for all levels of dopamine release. In contrast, there is dopamine-dependent persistent activity in area 46d of prefrontal cortex. DA, cortical dopamine availability.

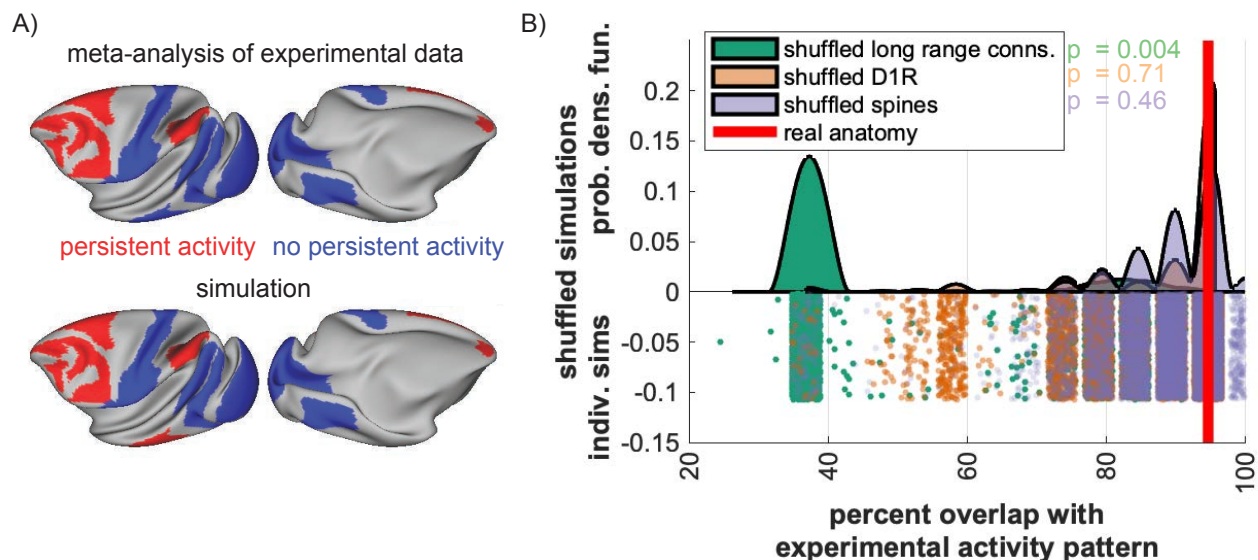

Figure 3: Long-range connectivity underlies the pattern of distributed working memory activity. A) There is a strong overlap (18/19 - 95%) between the pattern of persistent activity seen experimentally (Leavitt et al. 2017) and that predicted by the model. B) The percent overlap with the experimental persistent activity pattern is shown for the simulation based on the real anatomical data (red line) and for 10,000 simulations each based on shuffled long-range connections (green), shuffled D1 receptor pattern (orange) and shuffled dendritic spine counts pattern (purple). The top row half of the image shows the probability density function, and the bottom half the results of individual simulations based on shuffled anatomical data. The pattern of long-range connections was the most important determinant of the working memory activity pattern.

162 release, in the cortex dopamine levels remain elevated for seconds (Cass and Gerhardt 1995; Garris and Wightman 1994;  
 163 Muller et al. 2014; Mundorf et al. 2001), which is approximately the period of one trial in our simulations. Therefore,  
 164 for the majority of simulations we approximated this by setting dopamine to a constant value for each trial.

165 In simulations, stimulus-selective activity propagated from visual cortex to temporal, parietal and frontal cortex. Activity  
 166 in visual cortex was relatively insensitive to dopamine (Fig 2E,F). In all cases, there was a strong transient response in  
 167 visual areas, before a quick return to baseline firing rates, like V1 neurons recorded from behaving monkeys (Vugt et al.  
 168 2018). We observed a similar transient response in somatosensory areas in response to stimulus input to somatosensory  
 169 cortex (Fig S2), as seen experimentally (Romo and Rossi-Pool 2020). Delay-period activity in a large network of  
 170 prefrontal, lateral parietal and temporal areas showed an inverted-U relationship with dopamine levels (Fig 2D). A  
 171 similar pattern of delay period activity was observed following somatosensory input (Fig S2). A comparable inverted-U  
 172 relationship has been observed in prefrontal cortex following local application of D1 receptor agonists during working  
 173 memory tasks (Vijayraghavan et al. 2007; Wang et al. 2019). A mid-range level of dopamine release engaged a  
 174 distributed pattern of persistent activity throughout these areas (Fig 2E, F), but to low or too high release led to only a  
 175 transient response (Fig 2F). Thus our model suggests that the inverted-U relationship between D1 receptor stimulation  
 176 and persistent activity affects activity throughout a distributed fronto-parietal network, with little effect on early sensory  
 177 areas.



## 178 **Long-range connectivity determines the distributed working memory activity pattern**

179 The pattern of areas showing working memory activity in the model closely matches the areas in which persistent  
180 activity has been seen experimentally during working memory tasks. Leavitt and colleagues collated data from over 90  
181 studies recording single-unit and multi-unit activity as monkeys performed delay tasks (Leavitt et al. 2017). For each  
182 studied area, they quantified the number of studies in which persistent activity was observed or not observed during  
183 the delay period of the task. They mapped this information onto the Lyon atlas (Kennedy et al. 2013; Markov et al.  
184 2013, 2014a,b), which allowed us to compare our simulation with the collated delay-period activity observed in over 90  
185 electrophysiology studies. We first divided the cortex into persistent activity and non-persistent activity areas for both  
186 the experimental data and simulation. Areas were classified in the persistent activity group if at least 3 more studies  
187 observed persistent delay period activity than a lack of such activity. We excluded areas that have been assessed in less  
188 than three studies. Areas in the simulation were classified as having persistent activity if, for the last 500ms of the trial,  
189 they had mean firing rates of at least 5Hz greater than the pre-stimulus baseline firing rates. Of the 19 cortical areas in  
190 which such activity has been assessed during the delay period in at least three papers, 18 were in agreement between the  
191 simulation and experimental results ( $\chi^2 = 15.03, p = 0.0001$ , Fig 3A). Overall, the experimentally observed persistent  
192 activity from numerous studies is reproduced, validating the model. This allows us to inspect the anatomical properties  
193 that underlie the distributed activity pattern and gain insight into the brain mechanisms that may produce it.

194 We repeated model simulations after shuffling the anatomical data. The delay period activity patterns for 30,000  
195 simulations based on the shuffled anatomy were compared to the pattern observed experimentally. Ten thousand  
196 simulations were run using shuffled long-range connections, shuffled D1 receptor expression and shuffled dendritic  
197 spine expression, separately. The overlap between the experimental persistent activity pattern and the model persistent  
198 activity pattern was strongly dependent on the pattern of long-range connections ( $p=0.0004$ ), but not on the pattern of  
199 D1 receptors ( $p = 0.71$ ) or dendritic spine count ( $p = 0.46$ ) (Fig 3B).

## 200 **Working memory deficits are more severe following lesions to areas with high D1 receptor density**

201 Next, we examined whether lesions to individual cortical areas would affect working memory activity. The effect of  
202 lesions depended on both the area lesioned, and the level of cortical dopamine. Lesions to some cortical areas (such as  
203 areas 32, or TEO) had little effect on persistent activity in the frontoparietal network. The effect of other lesions was  
204 relatively heterogeneous. Lesions to areas LIP and 46d led to a drop in persistent activity in the remaining frontoparietal  
205 network for all dopamine levels (Fig 4A). In contrast, a lesion to area 8B led to a profound loss of frontoparietal activity  
206 for most dopamine levels, but for a restricted range, activity throughout the remaining frontoparietal network could be  
207 returned to close to the unlesioned state (Fig 4A). This suggests that for some lesions, D1 agonists or antagonists could  
208 be effective at restoring normal working memory functioning, but the correct treatment may depend on the baseline  
209 cortical dopamine levels of the patient. In contrast, other lesions seem relatively unresponsive to alterations in cortical  
210 dopamine levels.

211 Lesions to area V1 and V2 led to a complete loss of visual working memory activity (Fig 4B). However, this was due to  
212 the fact that a visual stimulus must go through area V1 in order to gain access to the working memory system. We  
213 confirmed this by showing that lesions to V1 and V2 had no effect on working memory when somatosensory stimuli  
214 were used (with stimulus presented to primary somatosensory area 3). In the somatosensory working memory task,

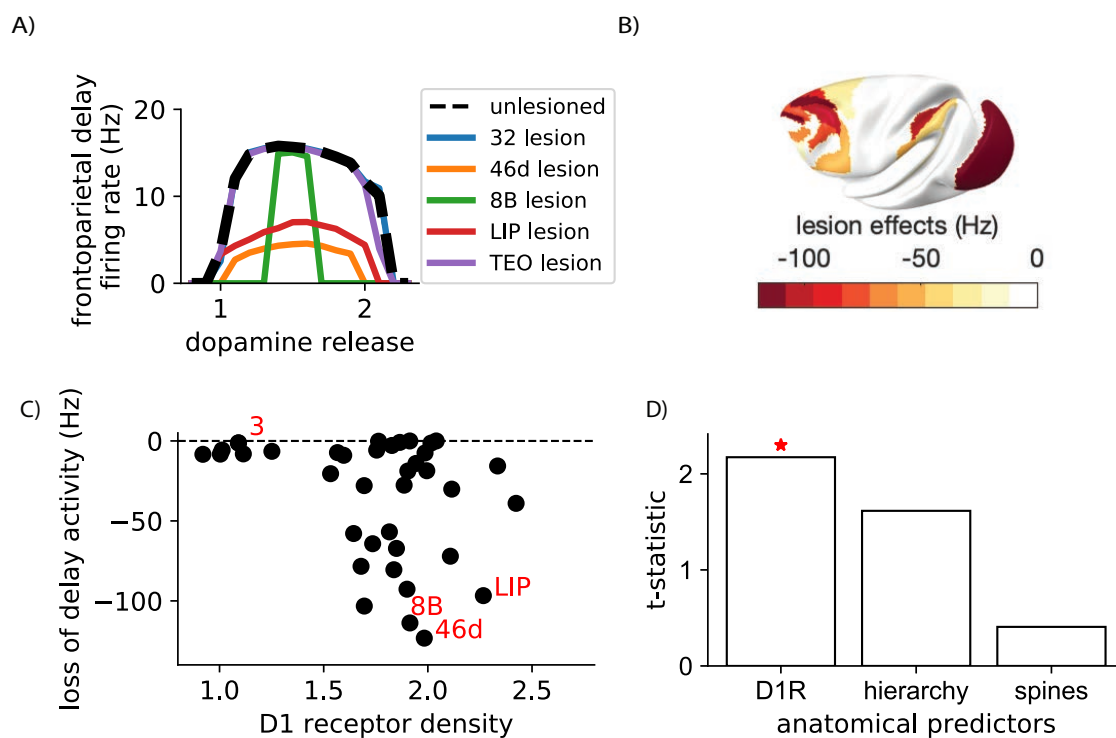

Figure 4: Lesions to areas with a high dopamine D1 receptor density disrupt working memory activity. A) Lesions to areas such as 46d and LIP led to reduced delay period firing across for all levels of dopamine release. Following some lesions (such as to area 8B) an optimal level of D1 receptor stimulation could restore close-to-normal working memory activity in the remaining network. B) The level of disruption to distributed working memory activity following lesions to each area, quantified as the total loss of working memory activity in the frontoparietal network summed across all dopamine release levels. Note that disruption to working memory following lesions to V1 and V2 is due to the visual stimuli being applied to V1. C) Lesions to areas with a higher D1 receptor density tended to have a larger impact on working memory activity. d) t-statistic for linear regressions predicting the drop in delay-period activity. The t-statistic for each single predictor linear regression model is shown separately. DA, dopamine release. D1R, D1 receptor density.

215 lesions to early somatosensory areas, and frontoparietal network areas caused memory deficits (Fig S3). This clearly  
 216 separates early sensory areas, which are required for signal propagation to the working memory system, from core  
 217 cross-modal working memory areas in prefrontal and posterior parietal cortex.

218 We quantified the effect of lesions as the difference between the inverted-U curved for the unlesioned and lesioned  
 219 networks (Fig 4A). In this way, the lesions to area 8B and 46d have similarly large effects on average across all  
 220 dopamine levels (Fig 4B,C). We then tested whether the anatomical data (namely the D1 receptor density, the spine  
 221 count or the cortical hierarchy) could predict the effects of cortical lesions on working memory activity. D1 receptor  
 222 density ( $F = 4.72$ ,  $p = 0.036$ , Fig 4C) was the strongest predictor of the lesion effects, and adding hierarchy or spine  
 223 count to the model did not significantly improve the fit (Fig 4D). Thus, lesions to areas with a higher D1 receptor  
 224 density are more likely to disrupt working memory activity.

## 225 Dopamine shifts between activity-silent and persistent activity modes of working memory

226 We endowed the large-scale model with short-term plasticity in order to assess the possibility of activity-silent working  
 227 memory in the large-scale network. Short-term plasticity was implemented at all synapses between excitatory cells

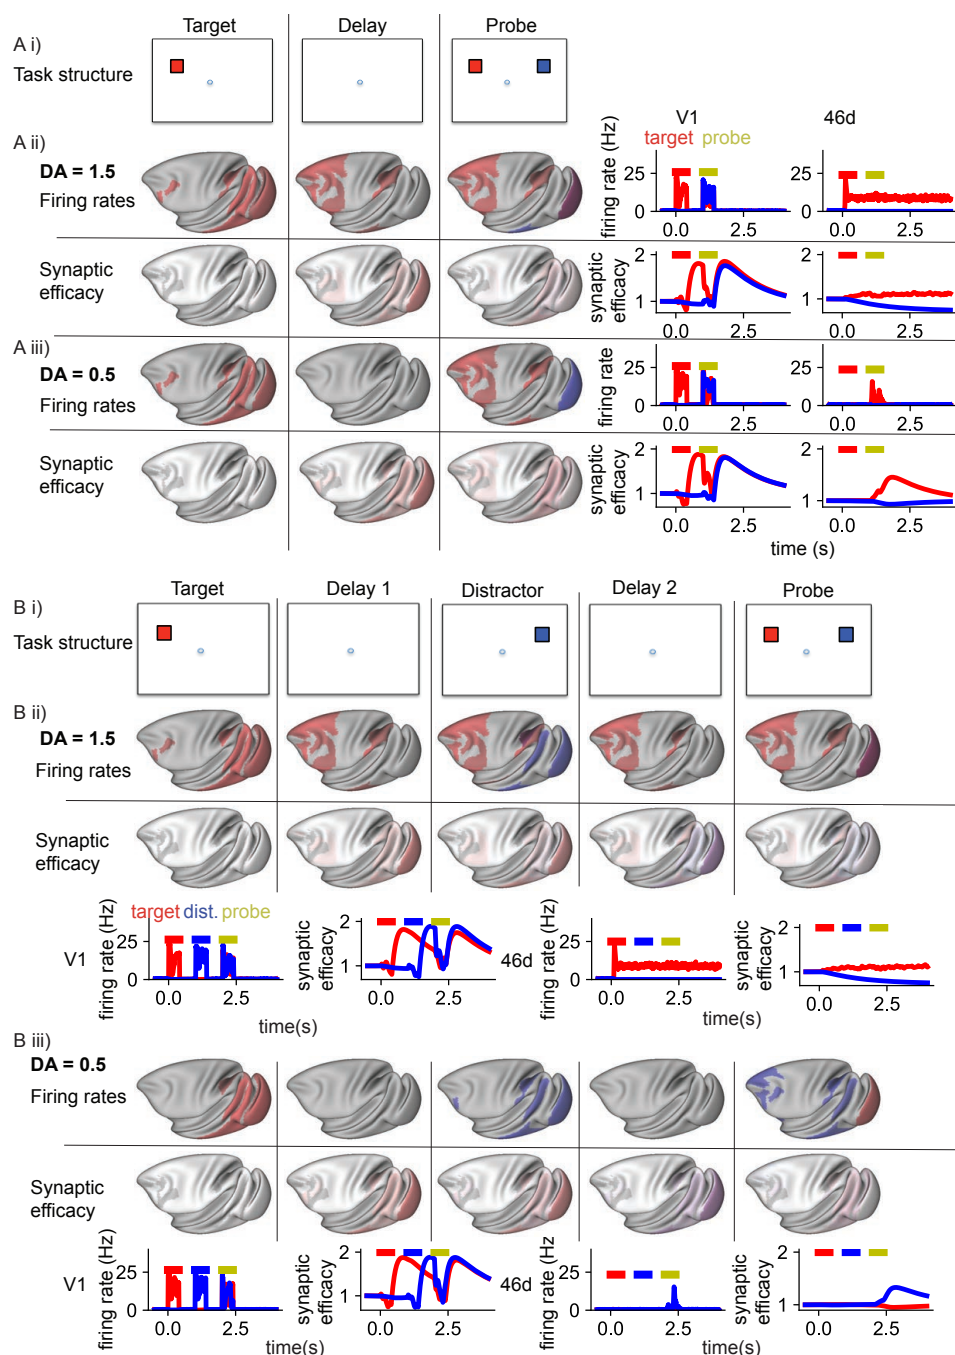

Figure 5: A dopamine-dependent shift between distractible activity-silent and distractor-resistant persistent-activity states. A i) Task structure. A target stimulus was followed by a delay and a probe stimulus. A ii) For mid-level dopamine release, activity relating to the target stimulus propagated from V1 through the hierarchy, and was maintained in persistent activity throughout the frontoparietal network. Top: firing rates on the surface (left) and in selected areas (right). Bottom: synaptic efficacy. A iii) For low-level dopamine release, activity (Top) in response to the stimulus was transient in visual and some frontoparietal areas. There was no persistent activity through the delay period. However, in response to the probe stimulus, activity representing the original target stimulus was regenerated throughout frontoparietal cortex. Bottom: The memory for the stimulus was stored as a short-term plasticity-dependent increase in synaptic efficacy through the delay period. This was particularly prominent for synapses from neurons with their cell bodies in sensory areas. B i) Task structure. A target stimulus was followed by a delay period, a distractor, another delay period and a probe stimulus. B ii) For mid-level dopamine release, target-related activity was maintained in persistent activity throughout the frontoparietal network, throughout the delay period through the distractor until the end of the trial. B iii) For low-level dopamine release, frontoparietal activity related to the most recent stimulus (i.e. the distractor) was regenerated during this probe stimulus. DA, dopamine release.

228 (Hempel et al. 2000; Wang et al. 2004b) (using the same parameters as Mongillo et al. 2008), and from excitatory  
229 to SST/CB cells (Lee et al. 2013; Silberberg and Markram 2007). We investigated activity-silent representations  
230 by 'pinging' the system, with a neutral stimulus, and reading out the activity generated in response, similar to the  
231 experimental protocol in Wolff et al. 2017 (Fig 5A i).

232 For optimal mid levels of dopamine release (Fig 5A ii), the model generated persistent activity that was very similar to  
233 the network without short-term plasticity. For both low and high levels of dopamine release there was no persistent  
234 activity (Fig 5A iii). However, when we 'pinged' the system with a neutral stimulus, activity relating to the target cue  
235 was transiently generated throughout the frontoparietal network (Fig 5A iii). Short-term synaptic plasticity increased  
236 the synaptic efficacy for connections between neurons coding for the target stimulus during the delay period. However,  
237 most of the increase in synaptic efficacy was in synaptic connections from neurons in sensory areas (Fig 5A iii). When  
238 short-term synaptic plasticity was restricted to neurons only in sensory areas, pinging the system still resulted in a  
239 reactivation of the target-related activity (Fig S4). This suggests that synaptic plasticity in local prefrontal cortical  
240 neurons is not required for activity-silent working memory. However, when we restricted short-term plasticity to only  
241 local connections, we could not regenerate activity related to the target stimulus with the ping. This suggests that  
242 short-term plasticity on long-range connections from sensory areas is required for activity-silent working memory in  
243 the large-scale cortical network. Furthermore, dopamine release can switch the system from an activity-silent, to a  
244 persistent activity regime.

245 Why does the brain have two parallel systems for holding items in short-term memory? To explore this further, we  
246 simulated the model using a "ping protocol" (Rose et al. 2016; Wolff et al. 2017). After a behaviorally relevant cue  
247 (stimulus A) and during the delay period, we introduced a distractor (stimulus B) which should be filtered out by the  
248 network; then a neutral ping stimulus exciting both neural populations is presented (Fig 5B i). For mid-level dopamine  
249 release, persistent activity coding for the target stimulus is engaged, and maintained through the distractor and ping  
250 (Fig 5B ii). The distractor is only transiently represented in IT and LIP (compare with Suzuki and Gottlieb 2013), but  
251 does not reach most of the frontoparietal network. In the low and high dopamine cases, during the ping, activity-silent  
252 mechanisms regenerate activity related to the last encoded stimulus, namely the distractor, in frontal and parietal cortex  
253 (Fig 5B iii). This suggests that dopamine can switch the cortex from an activity-silent working memory mode to a  
254 robust, distractor-resistant persistent activity working memory mode.

### 255 **Dopamine increases distractor resistance by shifting the subcellular target of inhibition**

256 How does dopamine protect working memory from distraction? To examine this question, we analysed activity within  
257 VIP/CR and SST/CB neurons during a working memory task with a distractor (Fig 6A). SST/CB and VIP/CR neurons  
258 are in competition, as they mutually inhibit each other. When SST/CB cell firing is higher, the pyramidal cell dendrites  
259 are relatively inhibited; conversely when VIP/CR cell firing is higher, the pyramidal cell dendrites are disinhibited.  
260 Each cortical area in the model contains two selective populations of pyramidal, SST/CB and VIP/CR cells. We first  
261 analysed trials in which the model successfully ignores the distractor. In the target-selective populations, the VIP/CR  
262 neurons fire at a much higher rate than the SST/CB neurons (Fig 6B, C). Thus the dendrites of the pyramidal cells  
263 sensitive to the target are disinhibited, allowing long-range target-related activity to flow between cortical areas. In the  
264 distractor sensitive populations, throughout the frontoparietal network, the SST/CB neurons fire at a slightly higher rate

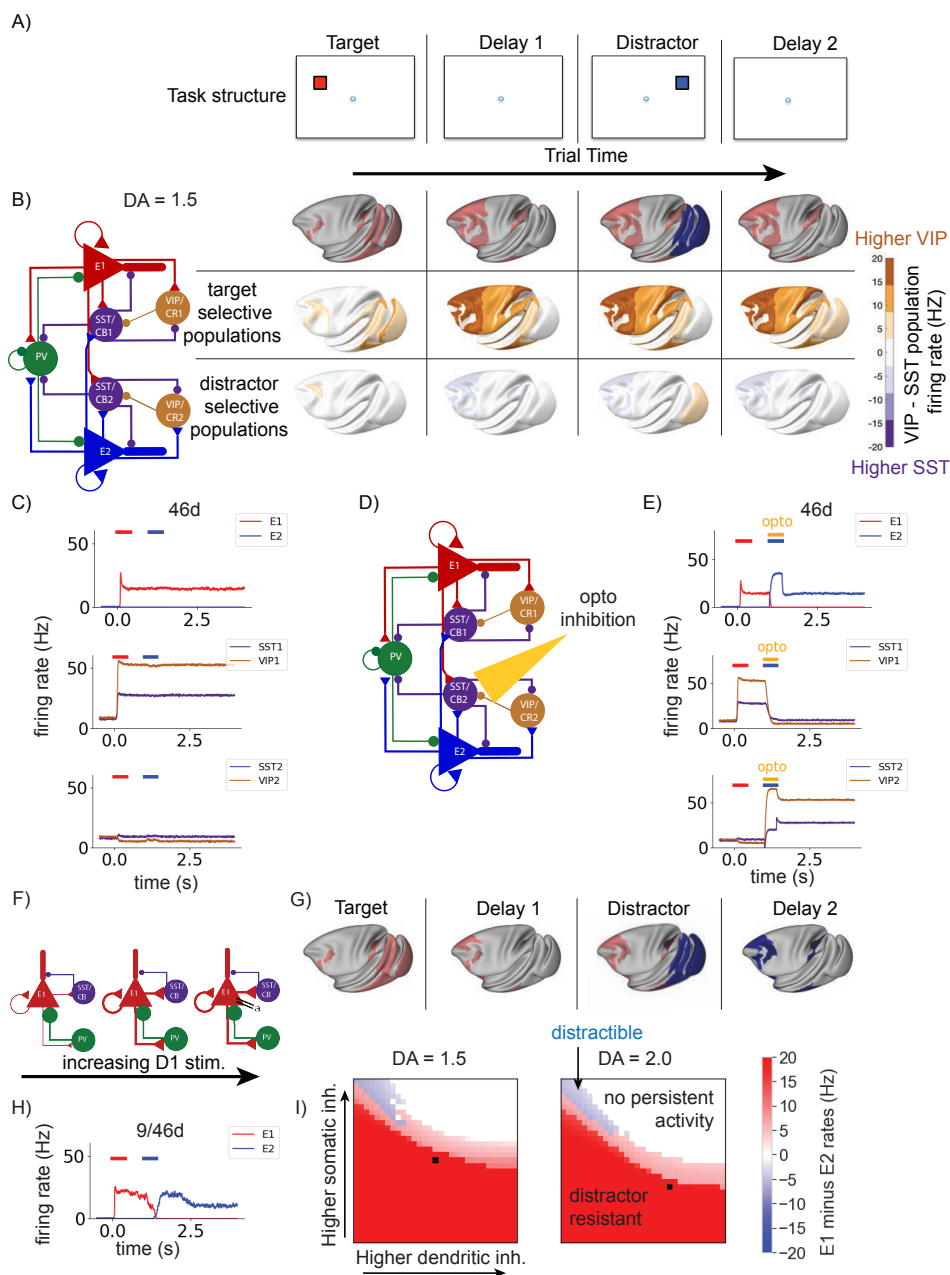

**Figure 6: Dopamine increases distractor resistance by shifting the subcellular target of inhibition.** A) Task structure. A target stimulus was followed by a delay, a distractor stimulus and another delay period. B) For mid-level dopamine release, persistent target-related activity (red) was present in the frontoparietal network through the delay and the distractor until the end of the trial. Each cortical area contains populations of excitatory, somatostatin and VIP/CR cells that respond to the target stimulus (E1, SST1, VIP1), separate populations sensitive to the distractor stimulus (E2, SST2, VIP2) and PV cells. B and C) Throughout the delay period and distractor stimulus, activity in VIP1 is higher than in SST1, leading to disinhibition of the E1 dendrite. In contrast, activity in VIP2 is slightly lower than in SST2, leading to inhibition of the E2 dendrite. D) We tested the causal effect of the SST2 activity, by transiently inactivating SST2 populations in the frontoparietal network during the presentation of the distractor stimulus (simulating optogenetic inhibition). E) On trials in which SST2 populations were inhibited, activity relating to the distractor stimulus propagated from early sensory areas to frontoparietal areas, and the network maintained distractor-related activity until the end of the trial. F) We then removed the dopamine modulation of somatic and dendritic inhibition, while keeping the other dopamine effects as before. G,H) Without the dopamine-dependent switch towards dendritic inhibition, the network became distractible, with distractor-related activity dominating at the end of the trial. I) We identified the model behaviour for different dopamine levels, across different levels of dendritic and somatic inhibition. Consistently across dopamine levels, higher somatic, and lower dendritic inhibition was associated with distractible working memory (blue). In contrast, lower somatic, and higher somatic inhibition was associated with distractor-resistant working memory (red). High dendritic and high somatic inhibition results in no persistent activity (white). The levels of dendritic and somatic inhibition associated with the standard dopamine modulation used in the rest of the paper marked by a black square. DA, cortical dopamine availability.

265 than the VIP/CR cells. Thus distractor-related activity from other cortical areas is blocked from entering the dendrites  
266 of distractor-sensitive pyramidal cells in frontal and parietal cortex.

267 The relative inhibition of distractor-population dendrites is rather subtle. To test the importance of this effect, we simu-  
268 lated optogenetic inhibition of the SST/CB populations that inhibit the distractor-sensitive pyramidal cells (SST/CB2,  
269 Fig 6D). We transiently inhibited the SST/CB2 cells in the frontoparietal network during the presentation of the  
270 distractor. This transient inhibition of SST/CB2 cells was sufficient to switch the network to a distractible state, with the  
271 distractor stimulus held in working memory until the end of the trial (Fig 6E).

272 As dopamine increases the strength of inhibition to the dendrites, and decreases inhibition to the soma, it is possible that  
273 this aspect of dopamine modulation enhances distractor-resistance of the system. We removed this effect of dopamine  
274 modulation, while applying the other effects of dopamine as before (Fig 6F). We repeated the working memory task with  
275 the distractor with a mid-level of dopamine, which normally results in distractor-resistant working memory (Fig 6 A,B).  
276 Without the shift of inhibition from the soma to the dendrite, the system becomes distractible (Fig 6G, H). We searched  
277 the parameter space, and found that, when local cortical areas were independently capable of maintaining persistent  
278 activity (e.g.,  $\mu^{E,E} = 1.25$ ,  $g_{E,E}^{self} = 0.33nA$ ), high somatic inhibition and low dendritic inhibition was generally  
279 associated with distractibility (Fig 6I). Low somatic and high dendritic inhibition was associated with distractor-resistant  
280 behaviour (Fig 6I, S5). Therefore dopamine shifts inhibition from the soma to the dendrite, and stops distractor stimuli  
281 from sensory areas disrupting ongoing persistent activity in the frontoparietal network.

## 282 **Learning to optimally time dopamine release via reinforcement**

283 We have shown how dopamine can render the cortex resistant to distraction, but one potential objection is that a  
284 behavioral relevant cue does not always precede a distractor. As a matter of fact, in real life we experience a constant  
285 flow of sensory inputs, our working memory system must be flexible in determining the timing of relevant versus  
286 irrelevant information. In laboratory experiments, one can assess this flexibility by presenting stimuli to be ignored  
287 before the relevant stimulus appears (e.g. Atlan et al. 2018). Dopamine neurons fire in response to task-relevant stimuli  
288 (Schultz et al. 1993), but should not fire in response to task-irrelevant distracting stimuli. We hypothesised that the  
289 correct timing of dopamine release could be learned by simple reward-learning mechanisms.

290 We added a simplified model of the ventral tegmental area (VTA) with GABAergic and dopaminergic neurons to our  
291 large-scale cortical model (Fig 7A). Cortical pyramidal cells target both GABAergic and dopaminergic cells in the VTA  
292 (Soden et al. 2020). Dopaminergic cells are also strongly inhibited by local VTA GABAergic cells (Soden et al. 2020).  
293 Dopamine is released in cortex in response to VTA dopaminergic neuron firing, and cortical dopamine levels slowly  
294 return to baseline following cessation of dopaminergic neuron firing (Cass and Gerhardt 1995; Garris and Wightman  
295 1994; Muller et al. 2014; Mundorf et al. 2001). The synaptic strengths of cortical inputs from the selected populations  
296 to VTA populations are increased following a reward, and weakened following an incorrect response (Harnett et al.  
297 2009; Soltani and Wang 2006).

298 We tested the model on the target-distractor-ping task introduced earlier (Fig 5B i; 7 B). For the first 30 trials, the  
299 first stimulus (Cue 1, red) was rewarded (rule 1). For the following 30 trials the second stimulus (Cue 2, blue) was  
300 rewarded (rule 2). For the final 30 trials, we switched back to rule 1 (Fig 7B). By the seventh trial of the first block  
301 distractor-resistant persistent activity emerges, and the first cue is correctly remembered. This behaviour remained

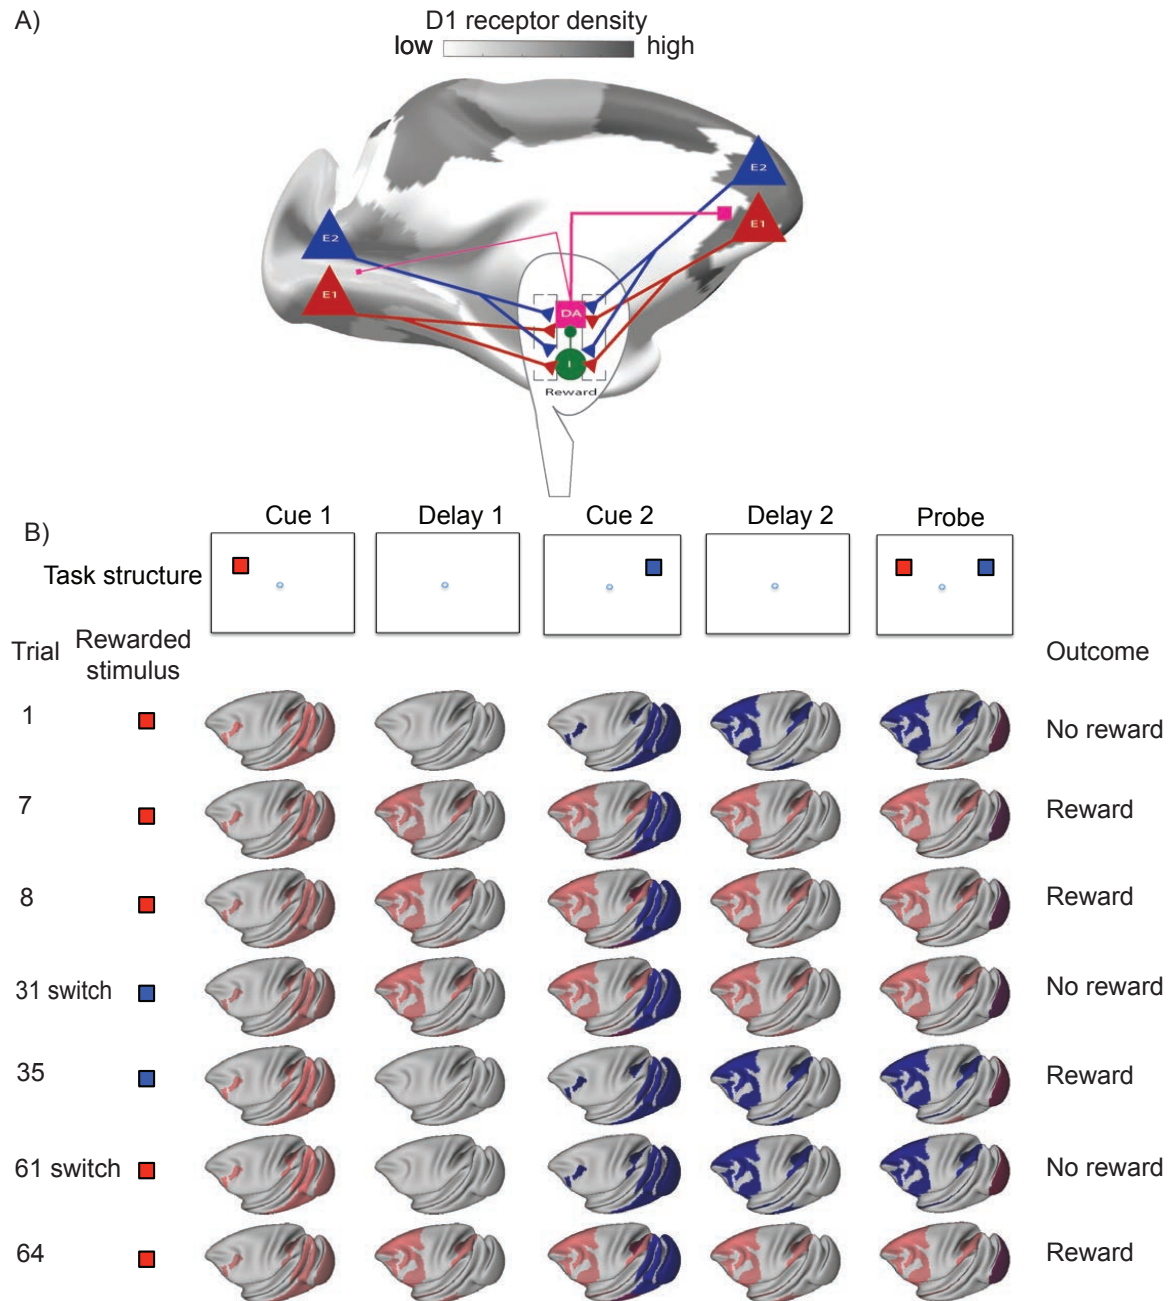

Figure 7: Reward-dependent learning of dopamine release appropriately engages persistent activity mechanisms. A) We designed a simplified VTA model and connected this bidirectionally to the large-scale cortical model. The VTA contained dopaminergic and GABAergic neuron populations. Dopamine was released dynamically depending on dopaminergic neuron activity. The strength of cortical inputs to VTA dopaminergic and GABAergic cells was updated at the end of each trial on the basis of trial outcome and choice. B) We simulated a task with two cues (red and blue) followed by a probe stimulus. The rewarded stimulus changed every 30 trials. Following each switch, after a few trials the network learns to store the appropriate stimulus in distributed persistent activity. This depends on high dopamine release in response to the rewarded stimulus and low release in response to the unrewarded stimulus.

302 until the next block. Following a few trials of the second block, dopamine release in response to the first stimulus was  
303 reduced, and neural populations throughout the cortex only transiently represented the first (now irrelevant) stimulus.  
304 However, dopamine response to the second stimulus increased, so that persistent activity was engaged following the  
305 second stimulus. Following the second rule switch, the system again switched back to engaging persistent activity  
306 in response to the first cue. Additionally, the number of trials to a successful switch gradually decreased with each  
307 switch. We further tested the model on a version of the task in which the relevant red cue could be shown either  
308 first or second within a block, before the blue cue became relevant in the second block. The model was also able to  
309 learn this task, although it took more trials (10-15) to learn the switch (for the first few blocks). Thus, with simple  
310 reward-learning mechanisms, the optimal timing of dopamine release can be learned, allowing flexible engagement of  
311 distributed persistent activity in working memory.

## 312 **Discussion**

313 Traditional neural network models of working memory and dopamine have focused on simulating activity within a  
314 local cortical circuit (Brunel and Wang 2001; Durstewitz et al. 2000). Here, by combining large-scale systematic  
315 receptor anatomy with large-scale cortical modelling, we show that dopamine can engage distributed persistent activity  
316 across multiple cortical areas underlying conscious, active working memory. The discovery of a macroscopic gradient  
317 of dopamine D1 receptor density per neuron, reported here for the first time, enabled us to investigate dopamine  
318 modulation across the large-scale primate cortex in a connectome- and biophysically- based model. The model  
319 represents a cross-level computational platform, endowed with multiple cell types. Our work leads to new predictions  
320 that would not have been possible with local circuit models. First, filtering out distractors to ensure robust working  
321 memory depends on dopamine action by virtue of shifting subcellular inhibition in favor of input control at dendrites  
322 of pyramidal neurons, and plasticity in the dopamine system can flexibly learn what stimuli are behaviorally relevant  
323 in a sequence of stimuli occurring in time. Second, when a short-term memory trace is encoded by an active-silent  
324 synaptic mechanisms, we found that short-term synaptic plasticity of long-range cortical connections is more important  
325 than local connections. 'Activity silent' memory strength is always the strongest for the latest stimulus, so this cannot  
326 subserve working memory in the presence of distractors. Third, the effect of lesioning a cortical area depends not only  
327 on that area's connectivity with the rest of the system but also the strength of its dopamine modulation.

### 328 **A gradient of D1 receptors along the cortical hierarchy**

329 Dopamine exerts a powerful influence on cortical computations across a range of cognitive functions (Brozoski et al.  
330 1979; Goldman-Rakic 1995). By quantifying the D1 receptor density across cortical areas, we can identify the limits  
331 to which dopamine can modulate cortical activity. In order to create a high-resolution, and high-fidelity map of  
332 cortical dopamine receptor architecture, we used quantitative *in-vitro* receptor autoradiography (Zilles and Palomero-  
333 Gallagher 2017). PET and SPECT scans provide the advantages of *in-vivo* measurements, such as information on  
334 individual and group differences, but are limited in spatial resolution and signal-to-noise ratio (Cassidy et al. 2016;  
335 Cools and D'Esposito 2011; Froudast-Walsh et al. 2017a; Laruelle et al. 1996; Roffman et al. 2016) and are often  
336 unreliable for cortical measurements (Egerton et al. 2010; Farde et al. 1988). Gene expression methods have certain  
337 advantages, especially RNA sequencing which can provide cell-specific data. However, mRNA expression is not always



338 closely related to, or even positively correlated with the receptor density at the synapse (Arnatkeviciute et al. 2019;  
339 Schwanhäusser et al. 2011). Receptor density at the synapse is the functionally important quantity, and is directly  
340 measured here. The map of D1 receptor density here greatly expands previous descriptions of D1 receptor densities  
341 (Goldman-Rakic et al. 1990; Impieri et al. 2019; Lidow et al. 1991; Niu et al. 2020; Richfield et al. 1989). We show  
342 that D1 receptor density increases along the cortical hierarchy, peaking in prefrontal and posterior parietal cortex. This  
343 gradient of dopamine receptors is an anatomical basis by which dopamine can modulate higher cognitive processing.

#### 344 **An inverted-U relationship between dopamine and distributed working memory activity**

345 Previous experimental and modelling studies have shown an inverted-U relationship between D1 receptor stimulation  
346 and persistent activity in the prefrontal cortex in monkeys performing working memory tasks (Brunel and Wang 2001;  
347 Vijayraghavan et al. 2007; Wang et al. 2019). Stimulation of VTA (presumably leading to cortical dopamine release) in  
348 resting monkeys also has an inverted-U effect on cortical activity in distributed areas across cortex (Murriss et al. 2020).  
349 By constructing a novel-large scale model based on the D1 receptor map and tract-tracing data, we were able to show  
350 that the inverted-U relationship between D1 receptor stimulation and persistent activity held across frontal and parietal  
351 cortex during working memory. A network of frontal and parietal areas engaged in persistent activity together within a  
352 wide range of D1 receptor stimulation, with some variability in the degree to which D1 receptor stimulation affected  
353 persistent activity within areas. The working memory activity pattern was strikingly similar to that seen experimentally,  
354 according to a meta-analysis of 90 electrophysiology studies of delay period activity in monkey cortex (Leavitt et al.  
355 2017). By analysing the model, we found that the pattern of long-range connections was the strongest determinant of  
356 the pattern of working memory activity.

#### 357 **Lesions to areas with a high D1 receptor density disrupt working memory**

358 Working memory activity was disrupted most strongly by lesions to areas with a high D1 receptor density, a prediction  
359 that can be tested experimentally. Human patients with traumatic brain injury often have working memory deficits  
360 (Dunning et al. 2016). Pharmacological treatment of these deficits, including with dopaminergic drugs, has seen mixed  
361 success (Froudust-Walsh et al. 2017b). Our model simulations suggest that for lesions to some cortical areas D1 agonists  
362 or antagonists could be effective at restoring normal working memory functioning, but the correct treatment may depend  
363 on the baseline cortical dopamine levels of the patient. In the future, our model could be adapted to simulate the working  
364 memory deficits and potential treatments of neurology or psychiatry patients based on their particular anatomy and  
365 patterns of cortical dopamine release or receptor density (Abi-Dargham et al. 2002; Cassidy et al. 2016; Pettersson-Yeo  
366 et al. 2011; Slifstein et al. 2015).

#### 367 **Ignition, silent activity and maintenance**

368 The strong and distributed activation of frontal and parietal cortex is reminiscent of the ignition response to consciously  
369 observed stimuli (Dehaene and Changeux 2011; Dehaene et al. 1998, 2003; Vugt et al. 2018). Conscious ignition  
370 and working memory maintenance have similar spatial patterns of activity (Trübtschek et al. 2017), and it has been  
371 suggested that conscious ignition is a first step to the entry of information to working memory (Mashour et al. 2020).  
372 However, for very low or high levels of D1 receptor stimulation, it was possible to maintain stimulus information in the

373 absence of persistent activity, via synaptic mechanisms. This was possible regardless of whether the original stimulus  
374 resulted in prefrontal activity. Unconscious working memory results in similarly correct behavioural performance,  
375 without the characteristic frontoparietal delay-period activity (Trübtschek et al. 2017, 2019). Unconscious working  
376 memory is thought to rely on ‘activity-silent’ synaptic mechanisms (Stokes 2015; Trübtschek et al. 2017). Slow cellular  
377 and synaptic processes may not only contribute to such mechanisms but also induce trial-by-trial history-dependent  
378 effects (Barbosa et al. 2020; Bliss and D’Esposito 2017; Carter and Wang 2007; Pereira and Wang 2015). Previous  
379 models of working memory with short-term synaptic plasticity have focused on local activity in the prefrontal cortex  
380 (Mongillo et al. 2008; Stokes 2015), and thus implicitly imply that it is short-term plasticity in local connections  
381 between prefrontal neurons that stores the memory trace. These models also assume that prefrontal neurons must have  
382 been sufficiently activated by the original stimulus in order to enable local short-term facilitation, a proposition that  
383 seems inconsistent with unconscious working memory. We show that short-term facilitation in long-range feedforward  
384 connections from early sensory areas to frontal and parietal cortex is a potential substrate for ‘activity-silent’ working  
385 memory in the absence of an initial prefrontal response to the stimulus. Given that experimental and modelling evidence  
386 suggests that manipulation of stored information requires a re-emergence of strong distributed activity (Masse et al.  
387 2019; Trübtschek et al. 2019), the silent state may be better described as ‘short-term memory’, as noted by other  
388 authors (Mashour et al. 2020; Masse et al. 2020). The brain may then reserve widespread persistent activity for  
389 important information that must be used and manipulated to drive behavior. The model in Barbosa et al. 2020 suggests  
390 nonspecific excitatory or inhibitory currents could account for switches between active and silent states. We propose  
391 that dopamine could in fact account for the switch from silent to active state. Indeed, due to the inverted-U relationship  
392 between dopamine and persistent firing, a dopamine response to the reward at the end of a trial could also terminate  
393 persistent activity. Our model also suggests that memories stored in the active state are more robust to distraction  
394 compared to memories stored in the silent state. This suggests that dopamine may be released in order to focus attention  
395 on salient items in working memory, and protect them from distraction.

#### 396 **Dopamine increases distractor resistance by shifting the subcellular target of inhibition**

397 The resilience of the active working memory state in the model depended on SST/CB cells blocking distracting inputs  
398 from sensory areas to the dendrites of pyramidal cells in frontal and parietal cortex. Previous modelling work on local  
399 cortical circuits has suggested that greater dendritic and less somatic inhibition could increase distractor-resistance  
400 (Wang et al. 2004a), and that selective disinhibition of the dendrite (through VIP/CR cells) could selectively allow  
401 information to be passed through the network (Yang et al. 2016). In our large-scale model, VIP/CR cells selectively  
402 disinhibited the dendrites of cells selective to the target stimulus, allowing target-related activity to flow through the  
403 cortical network. D1 receptors in monkey cortex are more strongly expressed on SST/CB neurons than other interneuron  
404 types (Mueller et al. 2019), and application of dopamine to a frontal cortex slice increases inhibition to the dendrite, and  
405 decreases inhibition to the soma of pyramidal cells (Gao et al. 2003). We found that, as long as local cortical areas  
406 (or potentially cortico-subcortical loops) are capable of maintaining persistent activity, then shifting the balance of  
407 inhibition from the soma to the dendrite can allow for maintenance of an active representation of a stimulus in persistent  
408 activity, while shielding it from distracting input from sensory areas.

409 Distractor-resistance in response to all stimuli could render the working memory system inflexible, and unresponsive  
410 to new, potentially important inputs. Inspired by previous models of prefrontal cortex and basal ganglia (Braver and

411 Cohen 2000; Frank 2005), we show that using simple reward-based learning, the timing of dopamine release to the  
412 cortex can be learned in order to engage distributed persistent activity throughout the frontoparietal network in response  
413 to behaviourally-relevant stimuli. In contrast, irrelevant, or less salient stimuli result in lower dopamine release, and  
414 may be remembered via silent mechanisms, or forgotten.

## 415 **Conclusion**

416 We uncovered a macroscopic gradient of dopamine D1 receptor density along the cortical hierarchy. By building  
417 a novel large-scale anatomically-constrained model of monkey cortex, we show how dopamine can engage robust  
418 distributed persistent activity mechanisms across connected higher cortical areas, and protect memories of behaviourally  
419 relevant-stimuli from distraction. As distributed persistent activity is necessary for the manipulation of thoughts in  
420 working memory (Masse et al. 2019; Trübtschek et al. 2019), dopamine release in the cortex may be a key step towards  
421 higher cognitive thought.

## 422 **Methods**

### 423 **Overview of anatomical data**

424 In this study, we combine post-mortem anatomical data on receptor densities, white matter connectivity, neuron  
425 densities and dendritic spine counts. Each of these four anatomical measures was originally quantified using different  
426 parcellations of cortex. Large sections of the temporal lobe are not yet quantified for either the receptor autoradiography  
427 data, or the tract-tracing connectivity data. Collection of this data is underway and will be made available in future  
428 studies. With the exception of the receptor densities in the superior parietal lobe (Impieri et al. 2019) and intraparietal  
429 sulcus (Niu et al. 2020), all D1 receptor densities are reported for the first time in this study.

### 430 **A note on notation**

431 Subscripts in square brackets, such as  $[k]$  are used to denote cortical areas themselves. Subscripts not in brackets, such  
432 as  $i$  are used to denote populations of neurons within a cortical area. Superscripts are used to provide further clarifying  
433 information. We use the convention that targets are listed before sources, so that  $g_{i,j}$  would denote the strength of a  
434 connection from neural population  $j$  to neural population  $i$ . Parameter values are listed in Table 4.

### 435 **Quantification of receptor density across cortex - in-vitro autoradiography**

436 We analysed the brains of three adult male *Macaca fascicularis* specimens (between 6 and 8 years old; body weight  
437 between 5.2 and 6.6 kg) obtained from Covance, Münster, where they were used as control animals for pharmaceutical  
438 studies performed in compliance with legal requirements.

439 All experimental protocols were in accordance with the guidelines of the European laws for the care and use of animals  
440 for scientific purposes. Animals were sacrificed by means of an intravenous lethal dose of sodium pentobarbital. Brains  
441 were removed immediately from the skull, and brain stem and cerebellum were dissected off in close proximity to the  
442 cerebral peduncles. Hemispheres were separated and then cut into a rostral and a caudal block by a cut in the coronal  
443 plane of sectioning between the central and arcuate sulci. These blocks were frozen in isopentane at -40C to -50C, and

444 then stored in airtight plastic bags at -70C. Each block was serially sectioned in the coronal plane (section thickness 20  
445  $\mu\text{m}$ ) using a cryostat microtome (CM 3050, Leica, Germany). Sections were thaw-mounted on gelatine-coated slides,  
446 freeze-dried overnight and processed for visualization of D1 or D2 receptors, cell bodies (Merker 1983) or myelin  
447 (Gallyas 1979). Quantitative *in-vitro* receptor autoradiography was applied to label dopaminergic D1 and D2 receptors  
448 according to previously published protocols (Palomero-Gallagher and Zilles 2018; Zilles et al. 2002) encompassing  
449 a preincubation, a main incubation and a final rinsing step. For visualization of the D1 receptor, sections were first  
450 rehydrated and endogenous substances removed during a 20 minute preincubation at room temperature in a 50 mM  
451 Tris-HCl buffer (pH 7.4) containing 120 mM NaCl, 5 mM KCl, 2 mM CaCl<sub>2</sub> and 1 mM MgCl<sub>2</sub>. During the main  
452 incubation, sections were incubated with either 0.5 nM [<sup>3</sup>H]SCH 23390 alone (to determine total binding), or with 0.5  
453 nM [<sup>3</sup>H]SCH 23390 and 1 mM of the displacer mianserin (to determine the proportion of displaceable, non-specific  
454 binding) for 90 minutes at room temperature in the same buffer as used for the preincubation. Finally, the rinsing  
455 procedure consisted of two 20 minutes washing steps in cold buffer followed by a short dip in distilled water. For  
456 visualization of the D2 receptor, sections were preincubated 50 mM Tris-HCl buffer (pH 7.4) containing 150 mM NaCl  
457 and 1% ascorbate. In the main incubation, sections were incubated with either 0.3 nM [<sup>3</sup>H]raclopride alone, or with  
458 0.3 nM [<sup>3</sup>H]raclopride and 1  $\mu\text{M}$  of the displacer 1  $\mu\text{M}$  butaclamol for 45 minutes at room temperature in the same  
459 buffer as used for the preincubation. Rinsing consisted of six 1 minute washing steps in cold buffer followed by a short  
460 dip in distilled water. Specific binding is the difference between total and non-specific binding. Since the ligands and  
461 binding protocols used resulted in a displaceable binding, which was less than 5% of the total binding, total binding  
462 is considered to be equivalent of specific binding. Sections were dried in a cold stream of air, exposed together with  
463 plastic scales of known radioactivity against tritium-sensitive films (Hyperfilm, Amersham) for six (for the D1 receptor)  
464 or eight (for the D2 receptor) weeks, and ensuing autoradiographs processed by densitometry with a video-based image  
465 analysing technique (Palomero-Gallagher and Zilles 2018; Zilles et al. 2002). Autoradiographs were digitized using a  
466 CCD-camera, and stored as 8-bit grey value images with a spatial resolution of 2080x1542 pixels. Grey values ( $g$ ) in  
467 the co-exposed scales as well as experimental conditions were used to create a regression curve with which grey values  
468 in each pixel of an autoradiograph were transformed into binding site densities ( $B_{\text{max}}$ ) in fmol/mg protein by means of  
469 the formula

$$B_{\text{max}} = \frac{gR}{EBW^b S_a} \cdot \frac{K^D + L}{L} \quad (1)$$

470 where  $R$  is the radioactivity concentration (cpm) in a scale,  $E$  the efficiency of the scintillation counter used to determine  
471 the amount of radioactivity in the incubation buffer,  $B$  the number of decays per unit of time and radioactivity,  $W_b$  the  
472 protein weight of a standard,  $S_a$  the specific activity of the ligand,  $K_D$  the dissociation constant of the ligand, and  $L$  the  
473 free concentration of the ligand during incubation. For visualization purposes solely, autoradiographs were subsequently  
474 pseudo-colour coded by linear contrast enhancement and assignment of equally spaced density ranges to a spectral  
475 arrangement of eleven colours.

476 Cortical areas were identified by cytoarchitectonic analysis and receptor densities measured at comparable sites in the  
477 adjacent sections processed for receptor visualization. The mean receptor density for each area over a series of 3–5  
478 sections per animal and receptor was determined by density profiles extracted vertical to the cortical surface using  
479 Matlab-based in house software (Palomero-Gallagher and Zilles 2018).

## 480 **Neuronal density data**

481 The *in-vitro* autoradiography data accurately quantifies the density of receptors across cortex. However, it is important  
482 to bear in mind that the density of neurons also varies across the cortex. Collins and colleagues measured the density  
483 of neurons across the entire macaque cortex using the isotropic fractionator (a.k.a. brain soup) method (Collins et al.  
484 2010). After mapping the neuron density data from the study by Collins et al. 2010 and the receptor data to a common  
485 atlas, we divided the receptor density by the neuron density, to obtain an estimate of D1 receptors per neuron in each  
486 cortical area.

## 487 **Retrograde tract-tracing**

488 The inter-areal connectivity data in this paper is part of an ongoing effort to map the cortical connectome of the macaque  
489 using retrograde tract-tracing (Markov et al. 2013, 2014a,b). For each target area, a retrograde tracer was injected into  
490 the cortex. The tracer was taken up in the axon terminals in this area, and retrogradely transported to the cell bodies  
491 of neurons that projected to the target. These cell bodies could be throughout the brain. Each of these cell bodies in  
492 cortex was counted as a labelled neuron (LN). The amount of labelled neurons was counted in all cortical areas except  
493 for the injected target area. The cortical areas that send axons to the target area are called source areas. As there are  
494 uncontrollable differences in tracer volume and uptake between injections, we estimated the strength of connections as  
495 follows. For a given injection, the total number of cell bodies in the cortex outside of the injected (target) area was  
496 counted. The number of labeled neurons within a source cortical area was then divided by the number of labeled  
497 neurons in the whole cortex (excluding the target area), to give a fraction of labeled neurons (FLN). The FLN was  
498 averaged across all injections in a given target area. For this calculation, we include all areas in the entire cortical  
499 hemisphere ( $n^{areas} = 91$ ).

$$FLN_{[k,l]} = \frac{LN_{[k,l]}}{\sum_{l=1}^{n^{areas}} LN_{[k,l]}} \quad (2)$$

500 In addition, for each connection we defined the supragranular labeled neurons (SLN) as the fraction of neurons in the  
501 source area whose cell bodies were in the superficial (aka supragranular) layers.

$$SLN_{[k,l]} = \frac{LN_{[k,l]}^{supra}}{LN_{[k,l]}^{supra} + LN_{[k,l]}^{infra}} \quad (3)$$

502 The subiculum (SUB) and piriform cortex (PIR) have a qualitatively different laminar structure to the neocortical areas,  
503 and thus supra- and infra-laminar connections (and thus the SLN) from these areas are undefined. We thus removed all  
504 connections from these areas from the following calculations ( $n^{areas,SLN} = 89$ ). These connectivity matrices will be  
505 available on core-nets.org.

## 506 **Estimation of the cortical hierarchy**

507 Following (Markov et al. 2014a), we estimate the hierarchical position  $h$  of each area using the SLN values of its  
508 connections. Feedforward connections tend to originate in the supragranular layers, while feedback connections tend  
509 to originate in the deep layers of the source area (Barone et al. 2000; Felleman and Van Essen 1991). Moreover, if

510 a target area occupies a much higher hierarchical position than the source area, a greater proportion of the neurons  
 511 emerge from the supragranular layers of the source area than if the two areas are closer in the hierarchy (Barone et al.  
 512 2000). Likewise for the feedback connections, a greater hierarchical distance between the areas implies that the higher  
 513 area sends a greater proportion of its projections from the infragranular layers. This implies that the fraction of neurons  
 514 coming from the supragranular layers in a given connection gives an estimate of the relative hierarchical position of two  
 515 connected areas (Barone et al. 2000; Markov et al. 2014a).

516 Here, following (Markov et al. 2014a), we estimate a set of hierarchical levels (one per area) that best predicts the SLN  
 517 values for all connections in the dataset.

518 The model to estimate the hierarchy has the form

$$g(E(SLN)) = X\beta \quad (4)$$

519 where  $g$  is a function that links the SLN of the connection between areas to the hierarchical distance between them.  $\beta$   
 520 is a column vector of length  $n^{areas,SLN}$ , containing the hierarchy values to be estimated.  $X$  is an incidence matrix  
 521 of shape  $n^{conns} \times n^{areas,SLN}$ , where  $n^{conns}$  ( $= 2619$ ) is the number of connections between cortical areas in the  
 522 remaining dataset. Each row in  $X$  represents a connection, and each column represents a cortical area. All entries  
 523 in each row equal 0 except for the column corresponding to the source area, which has a value of -1, and the target  
 524 (recipient) area, which has a value of 1 (Strang 1993).

525 The hierarchical values can be estimated with maximum likelihood regression. However, the model is singular (the  
 526 rows sum to zero). In order to make the model identifiable, we therefore removed one column from  $X$ . We chose to  
 527 remove the column corresponding to area V1, which is therefore forced to have a hierarchical value of 0. However, the  
 528 choice of column is unimportant, as it is possible to estimate negative hierarchical values (in the case that other areas  
 529 are lower than V1 in the hierarchy).

530 We used the beta-binomial model. The binomial parameter  $p$  corresponds to the proportion of successes. This is thought  
 531 to be a random variable following a Beta distribution. The beta-binomial distribution depends on two parameters, the  
 532 mean ( $\mu$ , here the SLN), and the dispersion ( $\phi$ ). The beta-binomial model can account for the overdispersion of the  
 533 neural count data. Note that the SLN of each measured connection is input into the model, without averaging across  
 534 repeated injections.

535 The likelihood is written as

$$f(\mu, \phi; q, n) = \binom{n}{q} \frac{B\left(\mu\left(\frac{1-\phi}{\phi}\right) + q, (1-\mu)\left(\frac{1-\phi}{\phi}\right) + n - q\right)}{B\left(\mu\left(\frac{1-\phi}{\phi}\right), (1-\mu)\left(\frac{1-\phi}{\phi}\right)\right)} \quad (5)$$

536 where  $q$  is the number of neurons projecting from the supragranular layers,  $n$  is the number of neurons projecting from  
 537 all layers, and  $B$  is the beta function defined as

$$B(x, y) = \int_0^1 p^{x-1}(1-p)^{y-1} dp \quad (6)$$

538 with  $x, y > 0$ . We fit the model using  $\mu = \Phi(X\beta)$ , where  $\Phi$  is the cumulative Gaussian, as it maps the real numbers  
539 to the (0,1) range.  $\Phi^{-1} = g$  in equation 3 is the probit link function. The hierarchy is estimated by minimising the  
540 log-likelihood. For more details see (Markov et al. 2014a).

541 We then rescaled the hierarchy so that the maximum hierarchial value within the 40 region complete subgraph (containing  
542 all injected areas) equaled 1:

$$h_{[k]} = \frac{\beta_{[k]}}{\max(\beta_{subgraph})} \quad (7)$$

543 for all cortical areas  $k$  in the complete 40-area subgraph.

#### 544 **Integration of anatomical datasets**

545 All anatomical data was mapped to the appropriate parcellations on the Yerkes19 surface. For the present study, we  
546 mapped all data to the 40 area Lyon subgraph Markov et al. 2014b, as the areas in this parcellation were generally larger  
547 than those in the Jülich macaque atlas (Impieri et al., 2019; Niu et al., 2020; Rapan et al., In Prep; Niu et al., In prep;  
548 this paper) and the Queensland (spine count) injection sites (Elston 2007), and closer to standard areal descriptions than  
549 the Vanderbilt (neuronal density) (Collins et al. 2010) sections.

550 The receptor densities were quantified in 109 cortical regions defined by cyto- and receptor-architecture. The delineation  
551 of cortical region borders in the superior parietal lobe is described in (Impieri et al. 2019). Using the same method,  
552 anatomists (NPG, MN, LR) identified cortical areas on the basis of the receptor and cyto-architecture. See Figure 1 and  
553 associated data for the definition of the areas. Anatomists (NPG, MN, LR) carefully drew and independently revised  
554 defined borders on the Yerkes19 cortical surface (Donahue et al. 2016) to enable comparison with other data types. The  
555 D1 receptor data was mapped to the Lyon atlas as follows. For each area in the Lyon atlas, we searched for overlaps  
556 with areas in the Jülich macaque atlas. If more than 50% of the vertices within the area were also in the Jülich macaque  
557 atlas, the D1 receptor density for the area was calculated. All vertices within each Jülich area were assigned the mean  
558 value for that area. We averaged the D1 receptor density across all vertices that lay within both the Lyon area and  
559 the Jülich macaque atlas, thus performing a weighted average of the D1 receptor densities according to the degree of  
560 spatial overlap. Thirty-two of the 40 Lyon areas were assigned D1 receptor density in this way, with the remaining eight  
561 areas not overlapping sufficiently with the Jülich macaque atlas. Due to the strong positive correlation between the D1  
562 receptor/neuron density and the hierarchy (Fig 1), for the simulations we inferred values for the remaining eight regions  
563 using linear regression with hierarchy as the independent variable and D1 receptor/neuron density as the independent  
564 variable.

565 Neuron density data was taken from (Collins et al. 2010). In the original paper, the cortex was divided into 42 regions  
566 and displayed on a flatmap, with anatomical landmarks labeled (Fig 2 and S1 of that paper). The borders of these  
567 regions were drawn on the Yerkes19 surface by SFW with reference to the original paper (Collins et al. 2010), several  
568 anatomical papers from the same group (Beck and Kaas 1999; Cerkevich et al. 2014; Kaas 2004), the Jülich (109 areas)  
569 and the Lyon (Markov-132) atlases (Donahue et al. 2016; Markov et al. 2014b), and were independently assessed by  
570 anatomists (LR, MN, NPG). The neural density data covered the entire cortex. As such, we assigned neural density to

571 each area in the Lyon atlas, weighted by the spatial overlap with the original areas in the Vanderbilt atlas. D1 receptor  
572 density was divided by the neuron density to give the D1 receptor/neuron density in each area.

573 The Lyon atlas used to define the interareal connectivity data (Markov et al. 2014b) is already available on the Yerkes19  
574 surface (Donahue et al. 2016). The complete subgraph including bidirectional connectivity has since been expanded  
575 from 29 areas in Donahue et al. 2016 to 40 areas in this paper.

576 For the spine count data, outlines of the 27 injection sites were drawn on the Yerkes19 surface by SFW with reference to  
577 the original papers (most of which had substantial anatomical description and hand-drawn maps), as well as anatomical  
578 papers cited within the original papers (Cavada and Goldman-Rakic 1989; Preuss and Goldman-Rakic 1991) and the  
579 Lyon and Jülich macaque atlases. Again, boundaries were independently assessed by anatomists (LR, MN, NPG). Spine  
580 count data was expressed according to injection sites, rather than entire cortical areas. As such, we found the number of  
581 vertices from each injection site overlapping with each area in the Lyon atlas. For each Lyon area, the spine count was  
582 an average of the spine counts for all the injection sites overlapping with the area, weighted by the number of vertices  
583 of each injection site contained within the area. In this way we estimated the spine counts on pyramidal cells in 24 of  
584 the 40 regions in the Lyon atlas. Based on the strong positive correlation between spine count and cortical hierarchy ( $r$   
585 = 0.61,  $p = 0.001$ ), and following previous work (Chaudhuri et al. 2015; Mejias and Wang 2019), we inferred the spine  
586 count for the remaining regions based on the hierarchy using linear regression.

587 Delineations of the areal borders for each atlas, and the anatomical data in the Yerkes19 space will be made available on  
588 the BALS database upon publication.

## 589 **Overview of dynamical models**

590 We first describe the connectivity structure of our local circuit model, and how dopamine modulates the efficacy of  
591 these connections. We then describe a large-scale dynamical model, in which the local circuit is used as a building  
592 block, and placed in each of 40 cortical areas. We describe the various steps to building the large-scale model, including  
593 how to connect the cortical areas, apply heterogeneity of excitation and the gradient of dopamine. Lastly, we describe  
594 how we simulated working memory tasks, lesions and optogenetic inhibition in this model.

## 595 **Description of the local cortical circuit**

596 We describe a local cortical circuit containing populations of four distinct types of neurons. This is conceptually related  
597 to previous computational models of working memory involving multiple types of interneurons (Tanaka 1999; Wang  
598 et al. 2004a), and uses a mean field reduction of a spiking model (Brunel and Wang 2001; Wong and Wang 2006). PV,  
599 SST/CB and VIP/CR cells differed in the threshold and slope of their input-output function ( $f$ -I curve) (Bacci et al.  
600 2003), local (Adesnik et al. 2012; Jiang et al. 2015; Muñoz et al. 2017; Pfeffer et al. 2013; Tremblay et al. 2016) and  
601 long-range connectivity (Lee et al. 2013; Wall et al. 2016), adaptation rates (Kawaguchi 1993; Mendonça et al. 2016;  
602 Schuman et al. 2019), and NMDA/AMPA ratio (Lu et al. 2007).

603 The connectivity structure and strengths of the local circuit, are based on a synthesis of anatomical and physiological  
604 studies, and are captured in the local connectivity matrix  $G$  (Tables 1 and 2) (Jiang et al. 2015; Kalisman et al. 2005; Lee  
605 et al. 2013; Ma et al. 2012; Markram et al. 1997; Pfeffer et al. 2013; Silberberg and Markram 2007; Walker et al. 2016).



606 Note that connection probability and synaptic strength between neural types are generally positive correlated (Jiang  
607 et al. 2015). This simplifies the process of identifying the relative strengths of connections between neural populations  
608 in the circuit.

$$\begin{array}{c}
 G_E \\
 E1^{soma} \\
 E2^{soma} \\
 PV \\
 \text{to } SST1 \\
 SST2 \\
 VIP1 \\
 VIP2
 \end{array}
 \begin{array}{c}
 \text{from} \\
 E1^{soma} \quad E2^{soma} \\
 \left( \begin{array}{cc}
 g_{E,E}^{self} & 0 \\
 0 & g_{E,E}^{self} \\
 g_{PV,E} & g_{PV,E} \\
 g_{SST,E}^{self} & g_{SST,E}^{cross} \\
 g_{SST,E}^{cross} & g_{SST,E}^{self} \\
 g_{VIP,E} & 0 \\
 0 & g_{VIP,E}
 \end{array} \right)
 \end{array}
 \begin{array}{c}
 G_{I,[k]}^{dend} \\
 E1^{dend} \\
 E2^{dend}
 \end{array}
 \begin{array}{c}
 \text{from} \\
 SST1 \quad SST2 \\
 \left( \begin{array}{cc}
 g_{E^{dend},SST,[k]}^{DA} & 0 \\
 0 & g_{E^{dend},SST,[k]}^{DA}
 \end{array} \right)
 \end{array}$$

Table 1. Left: Local excitatory output connections target excitatory and inhibitory populations. Right: SST/CB interneurons target the dendrites of pyramidal cells.

$$\begin{array}{c}
 G_{I,[k]}^{soma} \\
 E1^{soma} \\
 E2^{soma} \\
 PV \\
 \text{to } SST1 \\
 SST2 \\
 VIP1 \\
 VIP2
 \end{array}
 \begin{array}{c}
 \text{from} \\
 PV \quad SST1 \quad SST2 \quad VIP1 \quad VIP2 \\
 \left( \begin{array}{ccccc}
 g_{E^{soma},PV,[k]}^{DA} & 0 & 0 & 0 & 0 \\
 g_{E^{soma},PV,[k]}^{DA} & 0 & 0 & 0 & 0 \\
 g_{PV,PV} & g_{PV,SST} & g_{PV,SST} & 0 & 0 \\
 0 & 0 & 0 & g_{SST,VIP} & 0 \\
 0 & 0 & 0 & 0 & g_{SST,VIP} \\
 0 & g_{VIP,SST} & 0 & 0 & 0 \\
 0 & 0 & g_{VIP,SST} & 0 & 0
 \end{array} \right)
 \end{array}$$

609 Table 2. PV cells inhibit the cell body of pyramidal cells, but are themselves inhibited by other PV cells and SST/CB  
610 cells. SST/CB cells and VIP/CR cells mutually inhibit each other.

611 See Table 4 for all parameter values.

## 612 Dopamine modulation

The density of dopamine D1 receptors per neuron was rescaled, so that the area with minimum density  $\rho_{min}^{raw}$  was set to zero, and the area with maximum density  $\rho_{max}^{raw}$  was set to one, with all other areas lying in between.

$$\rho_{[k]} = \frac{\rho_{[k]}^{raw} - \rho_{min}^{raw}}{\rho_{max}^{raw} - \rho_{min}^{raw}}$$

613 for all cortical areas  $k$ .

614 Network behavior was investigated for differing amounts of cortical dopamine availability ( $\lambda^{DA}$ ). The specific value  
615 of  $\lambda^{DA}$  used for each simulation is shown in the figures and main text. Note that for Figure 7,  $\lambda^{DA}$  is calculated  
616 dynamically throughout each trial. Cortical dopamine availability is related to the fraction of occupied D1 receptors  
617  $\lambda^{occ}$  through a sigmoid function. The fraction of occupied D1 receptors thus lies between 0 and 1, as expected.

$$\lambda^{occ} = \frac{e^{b^o(\lambda^{DA}-c^o)}}{1 + e^{b^o(\lambda^{DA}-c^o)}} \quad (8)$$

618 Dopamine increases the proportion of inhibition onto the dendrites of pyramidal cells (Gao et al. 2003). Therefore, we  
 619 simulated the effect of dopamine on dendritic inhibition as follows. The total amount of dendritic inhibition increases  
 620 (from a minimum to a maximum strength) as the total amount of occupied receptors increases. The total amount of  
 621 occupied receptors is equal to the receptor density multiplied by the fraction of occupied receptors.

$$g_{E_{dend,SST},[k]}^{DA} = g_{E_{dend,SST}}^{min} + \lambda^{occ} \rho_{[k]} (g_{E_{dend,SST}}^{max} - g_{E_{dend,SST}}^{min}) \quad (9)$$

622 Dopamine decreases the proportion of inhibition onto the soma of pyramidal cells (Gao et al. 2003). Therefore, we  
 623 simulated the effect of dopamine on somatic inhibition as follows. The total amount of somatic inhibition decreases  
 624 (from a maximum to a minimum strength) as the total amount of occupied receptors increases.

$$g_{E_{soma,PV},[k]}^{DA} = g_{E_{soma,PV}}^{max} + \lambda^{occ} \rho_{[k]} (g_{E_{soma,PV}}^{min} - g_{E_{soma,PV}}^{max}) \quad (10)$$

625 Dopamine also increases the strength of excitatory synaptic transmission via NMDA receptors (Seamans et al. 2001a).  
 626 We modeled this with a sigmoid function, so that dopamine primarily increases NMDA conductances at low and  
 627 medium dopamine concentrations, before reaching a plateau (Brunel and Wang 2001).

$$\nu_{[k]} = \frac{e^{b^\nu(\lambda^{occ} \rho_{[k]} - c^\nu)}}{1 + e^{b^\nu(\lambda^{occ} \rho_{[k]} - c^\nu)}} \quad (11)$$

628 Here  $b^\nu$  sets the slope of the sigmoid function,  $c^\nu$  sets the midpoint.

629 The effects of dopamine on NMDA transmission is then defined as

$$\nu_{[k]}^{DA} = 1 + \alpha \nu_{[k]} \quad (12)$$

630 where  $\alpha$  controls the strength of dopamine modulation on NMDA transmission.

631 High levels of D1 agonism lead to a reduction in pyramidal cell firing, particularly during the delay period of working  
 632 memory tasks. D1 receptor stimulation may lead to inhibition of ongoing activity by engaging an intracellular pathway  
 633 involving cyclic AMP, protein kinase A and either HCN or KCNQ channels (Arnsten et al. 2019; Gamo et al. 2015;  
 634 Vijayraghavan et al. 2007). The mechanisms by which HCN channels may hyperpolarise the cell are still under  
 635 debate (George et al. 2009; Pereira 2014). We simulated an increase in adaptation for very high levels of D1 receptor  
 636 stimulation with a sigmoid function, so that adaptation increases at high dopamine concentrations, before reaching a  
 637 plateau.

$$\mu_{[k]}^M = \frac{e^{b^M(\lambda^{occ} \rho_{[k]} - c^M)}}{1 + e^{b^M(\lambda^{occ} \rho_{[k]} - c^M)}} \quad (13)$$

638 **Description of dynamical variables**

639 The neural populations interact via synapses that contain NMDA, AMPA and GABA receptors. Each receptor has its  
640 own dynamics, governed by the following equations.

641 The synaptic variables are updated as follows (Wang 1999; Wong and Wang 2006; Yang et al. 2016)

$$\frac{ds^{NMDA}}{dt} = -\frac{s^{NMDA}}{\tau^{NMDA}} + (1 - s^{NMDA})\gamma_{NMDA}r_E \quad (14)$$

$$\frac{ds^{AMPA}}{dt} = -\frac{s^{AMPA}}{\tau^{AMPA}} + \gamma_{AMPA}r_E \quad (15)$$

$$\frac{ds^{GABA}}{dt} = -\frac{s^{GABA}}{\tau^{GABA}} + \gamma_I r_I \quad (16)$$

$$\frac{ds^{GABA,dend}}{dt} = -\frac{s^{GABA,dend}}{\tau^{GABA,dend}} + \gamma_I r_I \quad (17)$$

642 where  $s$  is the synaptic drive onto a particular receptor type,  $\tau$  is the time constant of decay of that receptor and  $\gamma_{NMDA}$ ,  
643  $\gamma_{AMPA}$  and  $\gamma_I$  are constants.  $r_E$  and  $r_I$  are the firing rates of the presynaptic excitatory and inhibitory cells targeting  
644 the NMDA, AMPA and GABA receptors, calculated below. Note that the inhibition onto the dendrite is slower than  
645 inhibition elsewhere ( $\tau^{GABA,dend} > \tau^{GABA}$ ) (Ali and Thomson 2008). Hence we calculate dynamics of dendritic and  
646 somatic inhibition separately.

647 Adaptation acts to reduce the firing rate when the rate is high, using the equation described in (Engel and Wang 2011),

$$\frac{da}{dt} = -\frac{a}{\tau^a} + r \quad (18)$$

648 where  $a$  is the adaptation variable,  $\tau^a$  is the adaptation time constant, and  $r$  is the firing rate of the neural population.

649 **NMDA/AMPA ratio**

650 The fraction of excitatory postsynaptic current that is dependent on NMDA vs AMPA receptors differs by cell type  
651 (e.g. with relatively more current via the NMDA receptors in SST/CB vs PV cells) (Lu et al. 2007). Thus, we allowed  
652 the strength of excitatory transmission via NMDA and AMPA receptors to vary by cell type, described in the NMDA  
653 fraction,  $\kappa$  (Table 4).

654 **Modulation of excitatory connections by dendritic spines**

$$\hat{\zeta}_{[k]} = \frac{\zeta_{[k]}^{raw} - \zeta_{min}^{raw}}{\zeta_{max}^{raw} - \zeta_{min}^{raw}}$$

655 for all cortical areas  $[k]$ .

$$z_{[k]} = z^{min} + \hat{\zeta}_{[k]}(1 - z^{min}) \quad (19)$$

656 where  $z^{min}$  sets the lower bound for the modulation of excitatory connections by the spine count,  $\zeta$ .

657 **Description of local currents**

658 The local NMDA current is calculated as follows

$$I_{i,[k]}^{NMDA,local} = z_{[k]} \kappa_i \nu_{[k]}^{DA} \sum_{j \in \{E_1, E_2\}} g_{i,j}^E s_j^{NMDA} \quad (20)$$

659 where the local excitatory connections via the NMDA receptors are scaled by the NMDA receptor fraction  $\kappa_i$ , the  
660 dendritic spine count  $z_{[k]}$  and the D1 receptor stimulation  $\nu_{[k]}^{DA}$  for all populations of neurons  $i$  and cortical areas  $k$ .

661 Similarly local excitatory connections via the AMPA receptors are scaled by the AMPA receptor fraction  $1 - \kappa_i$  and the  
662 dendritic spine count  $z_{[k]}$ .

$$I_{i,[k]}^{AMPA,local} = z_{[k]} (1 - \kappa_i) \sum_{j \in \{E_1, E_2\}} g_{i,j}^E s_j^{AMPA} \quad (21)$$

663 Local inhibitory connections are not explicitly modulated by the dendritic spine count (as spines are the locations of  
664 synapses between excitatory cortical neurons). Note however, that the connectivity structure  $g_{GABA}$  is modulated by  
665 the dopamine receptor density and occupancy (See Tables 1, 2 and 4).

$$I_i^{GABA} = \sum_{j \in \{Inh\}} g_{i,j}^{GABA} s_j^{GABA} \quad (22)$$

666 where  $Inh$  is the set of inhibitory neuron populations.

667 The currents onto the dendrites are calculated separately, in order to calculate the nonlinear transformation of the current  
668 in the dendrite. They depend on the noise and background currents, so are described below.

669 **Description of noise and background currents**

670 Noise is modeled as an Ornstein-Uhlenbeck process, separately for each population.

$$\tau_{AMPA} \frac{dI^{noise}(t)}{dt} = -I^{noise}(t) + \eta(t) \sqrt{\tau_{AMPA} \sigma_{noise}^2} \quad (23)$$

671 where  $\sigma_{noise}$  is the standard deviation of the noise and  $\eta$  is Gaussian white noise with zero mean and unit variance.

672 A constant background current  $I^{bg}$  was also added to each population (Table 4). This represents input from brain areas  
673 that are not explicitly modeled.

674 **Description of the adaptation current**

675 We include adaptation in excitatory cells (Kawaguchi 1993), SST/CB (Kawaguchi 1993, 1995) and VIP/CR cells  
676 (Mendonça et al. 2016; Schuman et al. 2019), but not PV cells (Kawaguchi 1993, 1995). This is reflected in their  
677 differing adaptation strengths  $g_{PV}^{adapt}$  and  $g^{adapt}$ , where  $g_{PV}^{adapt} = 0$ .

678 The adaptation current is

$$I_{i,[k]}^{adapt} = (g_i^a + g_i^m \mu_{[k]}^M) a_{i,[k]} \quad (24)$$

679 for all local populations  $i$  and cortical areas  $k$ .

680 Note that  $g_i^a$  represents the non-dopamine dependent adaptation, while  $g_i^n \mu_{[k]}^M$  controls the dopamine-dependent  
681 adaptation, which depends on both dopamine release and receptor density (equation 13).

## 682 Large-scale connectivity structure

683 Each of the cortical areas is connected using connectivity strengths derived from the retrograde tract-tracing data. Parts  
684 of this dataset of been included in previous publications (Markov et al. 2013, 2014a,b). The long-range connectivity  
685 matrices are built from the FLN matrix. However, as noted in (Mejias et al. 2016), the FLN matrix spans 5 orders of  
686 magnitude. The relationship between anatomical and physiological connectivity strengths is not clear, but if we were to  
687 use the raw FLN values in the large-scale model, many of the weaker connections would become irrelevant. To deal  
688 with this, we rescale the FLN matrix in order to increase the influence of smaller connections while maintaining the  
689 topological structure (Mejias et al. 2016; Mejias and Wang 2019).

$$w_{[k,l]} = \frac{FLN_{[k,l]}^{b_1}}{\sum_{l=1}^{n^{sub}} FLN_{[k,l]}^{b_1}} \quad (25)$$

690 Here we restrict calculations to the injected cortical areas  $i, j$ , allowing for complete bidirectional connectivity within  
691 the subgraph ( $n^{sub} = 40$ ). We use the same parameter values as in (Mejias et al. 2016; Mejias and Wang 2019) (Table  
692 4) to construct our interareal connectivity matrix  $W$ .

693 As noted previously, feedforward projections tend to originate in the supragranular layers, while feedback connections  
694 originate in the deep layers. Feedforward and feedback connections also likely have different cellular targets. Therefore  
695 it is useful to separate the long-distance feedforward and feedback connections.

$$w_{[k,l]}^{supra} = SLN_{[k,l]} w_{[k,l]} \quad (26)$$

$$w_{[k,l]}^{infra} = (1 - SLN_{[k,l]}) w_{[k,l]} \quad (27)$$

## 696 Interareal population interactions

697 The majority of interareal connections contain a mixture of axons projecting from deep and superficial layers. Long  
698 distance connections onto excitatory cells primarily target the distal dendrites (Petreanu et al. 2009) (Table 3). Therefore,  
699 in the model we assume that long-distance connections target the dendrites of excitatory cells. VIP/CR cells receive  
700 the strongest long-distance inputs of all inhibitory cells, while SST/CB receives the weakest (Lee et al. 2013; Wall  
701 et al. 2016) (Table 3, Table 4). This suggests that long-range connections effectively disinhibit the dendrite in the  
702 target area by exciting VIP/CR interneurons, while concurrently exciting the dendrite, to maximize the probability  
703 of information passing from the source area into the target area. Following Mejias and Wang 2019 we assume that  
704 feedback connections target inhibitory cells more strongly than feedforward connections.

705 Excitatory cells in different cortical areas with the same receptive fields are more likely to be functionally connected  
706 (Zandvakili and Kohn 2015). This is reflected in our model as follows. In the source area, there are two excitatory  
707 populations, 1 and 2, each sensitive to a particular feature of a visual stimulus (such as a location in the visual field).

708 Likewise in the target area, there are two populations 1 and 2, sensitive to the same visual features. We assume that  
 709 90% of the output of population 1 in the source area goes to population 1 in the target area, and the remaining 10% to  
 710 population 2. The converse is true for population 2 in the source area (it targets 10% population 1, 90% population 2;  
 711 Table 3, Table 4).

|           |             | from                 |                      |           |                  | from             |                                                              |
|-----------|-------------|----------------------|----------------------|-----------|------------------|------------------|--------------------------------------------------------------|
| $J^{E,E}$ |             | $E1_{soma}$          | $E2_{soma}$          | $J^{I,E}$ | $E1_{soma}$      | $E2_{soma}$      |                                                              |
| to        | $E1_{soma}$ | 0                    | 0                    | PV        | $g_{PV,E}^{LR}$  | $g_{PV,E}^{LR}$  | $\left( \begin{array}{c} \\ \\ \\ \\ \\ \end{array} \right)$ |
|           | $E2_{soma}$ | 0                    | 0                    | SST1      | $g_{SST,E}^{LR}$ | 0                |                                                              |
|           | $E1_{dend}$ | $g_{E,E}^{LR,self}$  | $g_{E,E}^{LR,cross}$ | to SST2   | 0                | $g_{SST,E}^{LR}$ |                                                              |
|           | $E2_{dend}$ | $g_{E,E}^{LR,cross}$ | $g_{E,E}^{LR,self}$  | VIP1      | $g_{VIP,E}$      | 0                |                                                              |
|           |             |                      |                      | VIP2      | 0                | $g_{VIP,E}$      |                                                              |

712 Table 3. Long-range targets onto excitatory (left) and inhibitory (right) cells

### 713 Disinhibitory circuit in the frontal eye fields

714 The frontal eye fields (areas 8m and 8l in the model), have a very high percentage of calretinin neurons, and relatively  
 715 fewer parvalbumin and calbindin neurons (Pouget et al. 2009). To account for this in the model, we relatively increased  
 716 the long-range inputs to VIP/CR cells in areas 8m and 8l, as detailed in Table 4. These changes are critical for persistent  
 717 activity in areas 8l and 8m, but otherwise do not greatly affect the behavior of the model. Without this change, the  
 718 overlap between the simulated delay activity pattern and the experimental delay activity pattern (as in Figure 3) is  
 719 still extremely high (17/19 areas correct, chi-square = 12.31 p = 0.0004), and the activity pattern depends on both the  
 720 long-range connectivity (p = 0.001), and D1 receptor distribution (p = 0.008), but not the spine count (p = 0.19). All  
 721 other results are unchanged.

### 722 Calculation of long-range currents

723 Long-range interactions are applied as follows:

$$724 \quad I_{i[k]}^{NMDA,E,E} = z_{[k]} \mu^{E,E} \nu_{[k]}^{DA} \kappa_i \sum_{l=1}^{n^{sub}} w_{[k,l]}^{supra} \sum_{j \in \{E_1, E_2\}} g_{i,j}^{E,E} S_{j[l]}^{NMDA} \quad (28)$$

724 where  $z_{[k]}$  is the dendritic spine count for area  $k$  (as defined above),  $\mu^{E,E}$  is the long-range connectivity strength onto  
 725 excitatory cells (See Table 4),  $\nu_{[k]}^{DA}$  is the degree of dopamine modulation of NMDA currents for area  $k$ ,  $\kappa_i$  is the  
 726 NMDA/AMPA fraction for population  $i$ ,  $w_{[k,l]}$  is the connection strength from area  $l$  to area  $k$ ,  $g_{i,j}^{E,E}$  sets the long-range  
 727 strength from population  $j$  to population  $i$  (Tables 3 and 4) and  $S_{j[l]}^{NMDA}$  is the synaptic NMDA drive from population  $j$   
 728 in source area  $l$ .

729 Similarly,

$$I_{i[k]}^{NMDA,I,E} = z_{[k]} \mu^{I,E} \nu_{[k]}^{DA} \kappa_i \sum_{l=1}^{n^{sub}} w_{[k,l]}^{infra} \sum_{j \in \{E_1, E_2\}} g_{i,j}^{I,E} S_{j[l]}^{NMDA} \quad (29)$$

730 The total long-range current via the NMDA receptors, is simply the concatenation of the two above terms  $I^{NMDA,E,E}$   
731 and  $I^{NMDA,I,E}$ .

$$I^{NMDA,LR} = (I^{NMDA,E,E}, I^{NMDA,I,E}) \quad (30)$$

732 The long-range AMPA current is calculated similarly,

$$I_{i[k]}^{AMPA,E,E} = z_{[k]}\mu^{E,E}(1 - \kappa_i) \sum_{l=1}^{n^{sub}} w_{[k,l]}^{supra} \sum_{j \in \{E_1, E_2\}} g_{i,j}^{E,E} S_{j[l]}^{AMPA} \quad (31)$$

733

$$I_{i[k]}^{AMPA,I,E} = z_{[k]}\mu^{I,E}(1 - \kappa_i) \sum_{l=1}^{n^{sub}} w_{[k,l]}^{infra} \sum_{j \in \{E_1, E_2\}} g_{i,j}^{I,E} S_{j[l]}^{AMPA} \quad (32)$$

$$I^{AMPA,LR} = (I^{AMPA,E,E}, I^{AMPA,I,E}) \quad (33)$$

### 734 Description of dendritic currents

735 The inhibitory current onto the dendrite comes from SST/CB cells and is modulated by dopamine (Table 1, equation 8)

$$I_i^{dend,inh} = \sum_{j \in \{SST1, SST2\}} g_{i,j}^{GABA,dend} S_j^{GABA} \quad (34)$$

736 The distal dendrites receive long-range input (from neurons in other areas), noise and background input. In addition,  
737 if the area receives a stimulus directly, then the external stimulus also targets the dendrites. Note that most local  
738 connections target the area around the soma (Markram et al. 1997; Petreanu et al. 2009). This is reflected in the model  
739 by having local connections exclusively target the soma compartment of pyramidal cells.

$$I_{i,[k]}^{dend,exc} = I_{i,[k]}^{NMDA,LR} + I_{i,[k]}^{AMPA,LR} + I_{i,[k]}^{stim} + I_{i,[k]}^{noise} + I_i^{background} \quad (35)$$

740 The dendritic nonlinearity is adapted from (Yang et al. 2016) and modeled as follows:

$$I^{soma,dend} = f_I(I^{dend,exc}, I^{dend,inh}) = c_1 \cdot \left[ \tanh \left( \frac{I^{dend,exc} + c_3 I^{dend,inh} + c_4}{c_5 e^{-I^{dend,inh}/c_6}} \right) \right] + c_2 \quad (36)$$

741 where  $I^{soma,dend}$  is the total current passed from the dendrite to the soma,  $I^{dend,exc}$  and  $I^{dend,inh}$  are the total  
742 excitatory and inhibitory current onto the dendrite, respectively.  $c_1$  to  $c_6$  control the gain, shift, inversion point and  
743 shape of the nonlinear function. These parameters are set to ensure that strong inhibition to the dendrite effectively  
744 blocks dendritic activity, but has little effect on somatic firing if the soma is directly stimulated (See Table 4) (Marlin  
745 and Carter 2014).

### 746 Application of external stimuli for tasks

747 In all simulations, the first stimulus is applied for 400ms. The second stimulus (Figures 5-7) is applied 600ms after  
748 the removal of the target stimulus for another 400ms. The two stimuli are of equal strength and duration, although  
749 the results are robust to a range of stimulus strengths (See Table 4 for parameter values). For Figures 2-7 in the main

750 text, a stimulus was applied to the dendrite of excitatory population 1 in area V1. For Figures 5-7 a second stimulus  
 751 was applied to the dendrite of excitatory population 2 of area V1. For Supplementary Figures 2 and 3, the stimuli  
 752 were applied to area 3 of primary somatosensory cortex instead. In all equations, the target and distractor stimuli are  
 753 designated by the term  $I^{stim}$ .

#### 754 **Total current in large-scale model**

755 The total current equals the sum of all long-range, local and external inputs, and intrinsic currents.

$$I_{total} = I^{NMDA,LR} + I^{AMPA,LR} + I^{NMDA,local} + I^{AMPA,local} + I^{GABA,local} + I^{soma,dend} + I^{adapt} + I^{noise} + I^{bg} + I^{stim} \quad (37)$$

#### 756 **Description of f-I curves**

757 The f-I (current to frequency) curve of the excitatory population is

$$f(I_E^{total}) = \frac{aI_E^{total} - b}{1 - e^{-d(aI_E^{total} - b)}} \quad (38)$$

758 where  $r_E$  is the firing rate of an populations of excitatory cells,  $I_E^{total}$  is the total input to the population,  $a$  is a gain  
 759 factor,  $d$  determines the shape of  $f(I_E^{total})$ , such that if  $d$  is large,  $f(I_E^{total})$  acts like a threshold-linear function, with  
 760 threshold  $b$  (Abbott and Chance 2005).

761 The f-I curves for the inhibitory neuron populations are modeled using a threshold-linear function

$$f(I_i^{total}) = \begin{cases} c_i I_i^{total} + r_i^0 & \text{for } I_i^{total} \geq -r_i^0/c_i \\ 0, & \text{otherwise} \end{cases} \quad (39)$$

762 where  $r_i$  is the firing rate of a population of inhibitory cells,  $I_i^{total}$  is the total input to the population.

763 The threshold  $r_i^0$  and slope  $c_i$  depend on the cell type  $i$  (Bacci et al. 2003). See Table 4 for parameter values.

764 The firing rates are updated as follows

$$\tau^{AMPA} \frac{dR}{dt} = -R + f(I^{total}) \quad (40)$$

765 for all cell types.

#### 766 **Short-term synaptic plasticity**

767 For Figure 5, we added short-term plasticity to synapses from excitatory cells to excitatory cells and SST/CB cells as  
 768 follows (Mongillo et al. 2008).

$$\frac{ds^{NMDA}}{dt} = -\frac{s^{NMDA}}{\tau^{NMDA}} + xu(1 - s^{NMDA})\gamma_{NMDA}\gamma_{xu}r_E \quad (41)$$

$$\frac{ds^{AMPA}}{dt} = -\frac{s^{AMPA}}{\tau^{AMPA}} + xu\gamma_{AMPA}\gamma_{xu}r_E \quad (42)$$



$$\frac{du}{dt} = \frac{U - u}{\tau^u} + U(1 - u)r_E \quad (43)$$

$$\frac{dx}{dt} = \frac{1 - x}{\tau^x} - uxr_E \quad (44)$$

769 with  $U = 0.2$ ,  $\tau^u = 1.5s$ ,  $\tau^x = 0.2s$ , as in Mongillo et al. 2008. We also added a term  $\gamma_{xu} = 2.5$  to account for the  
770 fact that the product  $xu$  is usually less than 1, and to keep firing rates similar to those in other simulations.

### 771 **Comparing the simulated and experimental patterns of delay activity**

772 In Figure 3, we compare the activity pattern of the model to the experimental pattern, and investigate its dependence on  
773 anatomical features. To shuffle anatomical connections, we shuffled connections within rows of the FLN matrix, so  
774 that the distribution of connections and connection strengths to each area remained constant, with the identity of the  
775 connections changing. The same reordering was applied to the SLN matrix. D1 receptor densities and spine counts  
776 were shuffled separately. Results were visualised using a custom version of a Raincloud Plot (Allen et al. 2019) to  
777 enable concurrent visualisation of the distribution and individual simulation results.

### 778 **Lesioning of cortical areas**

779 In Figure 4, we simulate the effects of a lesion to individual cortical areas. We do this by removing all input and  
780 output connections of the lesioned area in the connectivity matrices  $W^{E,E}$  and  $W^{I,E}$ . For the statistical analysis of the  
781 relationship between anatomical features and visual effects, we removed areas V1 and V2 from the analysis. This was  
782 due to the fact that these areas were crucial to the propagation of the visual stimulus, but not working memory *per se*  
783 (Fig 4 and Fig S3). We performed a stepwise-linear regression approach. However, in order to allow for fair comparison  
784 between the anatomical predictors, for Fig 4D, we show the t-statistics for individual linear regression models with each  
785 anatomical predictor separately.

### 786 **Simulated optogenetic inhibition of SST2 populations**

787 In Figure 6, we simulate the effects of optogenetic inhibition to the SST2 populations in cortical areas in the frontoparietal  
788 network. The frontoparietal network is defined according to the results of Leavitt et al. 2017, as in Figure 3. To do this,  
789 we apply an external inhibitory stimulus of 0.1nA to these populations for the duration of the distractor stimulus. This  
790 may be possible experimentally (initially in mice), by identifying cells that are both active to the distractor stimulus (via  
791 a *cfos* immediate early gene promoter) and expressing SST, and optogenetically inhibiting them (Abbas et al. 2018; Liu  
792 et al. 2012).

### 793 **Dynamics and connectivity within VTA**

794 For Figure 7, we investigate whether the dynamics of dopamine release can be learned in order to selectively maintain  
795 the desired working memory content. Note both dopaminergic and GABAergic cells in the VTA receive excitatory  
796 input from the cortex, while the majority of inhibition to dopaminergic cells comes from local VTA GABAergic cells  
797 (Soden et al. 2020).

The total current input to the dopamine cells in VTA is

$$I_{DA}^{total} = I_{DA}^{bg} + \sum_{k=1}^{n_{areas}} \sum_{j=1}^2 c_{E_j}^{vta,ctx} g_{DA,E_j}^{vta,ctx} S_{NMDA,E_j}^k + \sum_{k=1}^{n_{areas}} \sum_{j=1}^2 c_{E_j}^{vta,ctx} g_{DA,E_j}^{vta,ctx} S_{AMPA,E_j}^k + g_{DA,I}^{vta} S_{GABA}^{vta}$$

798 where  $g_{DA,E_j}^{vta,ctx}$  sets the maximum strength of cortical-VTA connections.  $c_{E_j}^{vta,ctx}$  is the fraction of synapses in an up  
799 state (Soltani and Wang 2006), and is updated via reinforcement learning (see below). Initial values are  $c_1^{vta,ctx} = 0.7$ ,  
800  $c_2^{vta,ctx} = 1$ .  $g_{DA,E_j}^{vta,ctx} = 0.047nA$  and  $g_{DA,I}^{vta} = -0.55nA$ .

801 The input to VTA inhibitory cells is

$$I_{vta,I}^{total} = I_{vta,I}^{bg} + \sum_{k=1}^{n_{areas}} \sum_{j=1}^2 c_{E_j}^{vta,ctx} g_{I,E_j}^{vta,ctx} S_{NMDA,E_j}^k + \sum_{k=1}^{n_{areas}} \sum_{j=1}^2 c_{E_j}^{vta,ctx} g_{I,E_j}^{vta,ctx} S_{AMPA,E_j}^k$$

802 where  $g_{I,E_j}^{vta,ctx} = 0.02nA$

803 Synaptic inputs to the VTA inhibitory are driven by facilitating synapses (Soden et al. 2020), as in equations 41-44, but  
804 with  $x = 0.87$  held constant and  $\tau^u = 200ms$

805 The firing rates of the dopamine cells  $r_{DA}$  as in equations 37 and 39. The firing rates of GABAergic cells are updated  
806 as in equations 38-39.

### 807 Cortical dopamine availability

For Figure 7, dopamine availability in the cortex  $\lambda^{DA}$  depends on the firing rates in the dopamine neurons as follows:

$$\frac{d\lambda^{DA}}{dt} = -\frac{\lambda^{DA}}{\tau^{DA}} + \gamma_{DA} r_{DA}$$

808 where  $\tau^{DA} = 3s$  and  $\gamma_{DA} = 0.05$ .

### 809 Reward-based learning

810 The fraction of cortex to VTA synapses in the up state is updated according to the outcome of the previous trial, using  
811 the simplified learning rule of Soltani and Wang 2006

$$c_{E_j}(T+1) = c_{E_j}(T) + \alpha[1 - c_{E_j}(T)]$$

if target  $j$  is selected and rewarded and

$$c_{E_j}(T+1) = c_{E_j}(T) - \alpha[c_{E_j}(T)]$$

812 if target  $j$  is selected and not rewarded.  $T$  is the current trial and  $\alpha = 0.2$  is the learning rate.

Table 4. Parameters for Numerical Simulations

| Parameter                                                                      | Description                       | Value                                              |
|--------------------------------------------------------------------------------|-----------------------------------|----------------------------------------------------|
| $g_{E,E}^{self}, g_{PV,E}, g_{SST,E}^{self}$<br>$g_{SST,E}^{cross}, g_{VIP,E}$ | Excitatory synaptic strengths     | 0.18nA, 0.174nA,<br>0.0435nA, 0.0435nA,<br>0.058nA |
| $g_{E_{soma},PV}^{min}, g_{E_{soma},PV}^{max}$<br>$g_{PV,PV}$                  | PV synaptic strengths             | -0.001nA, -0.4nA,<br>-0.18nA                       |
| $g_{E_{dend},SST}^{min}, g_{E_{dend},SST}^{max}$<br>$g_{PV,SST}, g_{VIP,SST}$  | SST/CB synaptic strengths         | -0.09nA, -0.11nA,<br>-0.17nA, -0.1nA               |
| $g_{SST,VIP}$                                                                  | VIP/CR synaptic strengths         | -0.05nA                                            |
| $\tau^{NMDA}, \tau^{AMPA}$                                                     | E synaptic time constants         | 60ms, 2ms                                          |
| $\tau^{GABA}, \tau^{GABA,dend}$                                                | I synaptic time constants         | 5ms, 10ms                                          |
| $\tau^a$                                                                       | adaptation time constant          | 100ms                                              |
| $\gamma^{NMDA}, \gamma^{AMPA}, \gamma^I$                                       | synaptic rise constants           | 1.282, 5, 2                                        |
| $\kappa_{PV}, \kappa_{other}$                                                  | $\frac{NMDA}{NMDA+AMPA}$ fraction | 0.8, 0.9                                           |
| $z^{min}$                                                                      | Min spine val                     | 0.45                                               |
| $\sigma_{noise}$                                                               | std. dev. of noise                | 0.005nA                                            |
| $I_{E_{soma}}^{bg}, I_{i \in Inh}^{bg}, I_{E_{dend}}^{bg}$                     | Background inputs                 | 0.31nA, 0.30nA, 0.03nA                             |
| $c_{1-6}$                                                                      | Dendrite parameters               | 0.12nA, 0.13624nA, 7,<br>0nA, 0.00964nA, 0.02nA    |
| $g_{PV}^a, g_{other}^a$                                                        | Adaptation strength               | 0nA, -0.004nA                                      |
| $a, b, d$                                                                      | f-I curve (E)                     | 0.135 Hz/nA, 54Hz,<br>0.308s                       |
| $c_{SST,VIP}, r_{SST,VIP}^0$                                                   | f-I curve (SST, VIP)              | 132Hz/nA, 33Hz                                     |
| $c_{PV}, r_{PV}^0$                                                             | f-I curve (PV cells)              | 330Hz/nA, 95Hz                                     |
| $b_1$                                                                          | rescale FLN                       | 0.3                                                |
| $g_{E,E}^{LR,self}, g_{E,E}^{LR,cross}$                                        | Long-range E targets              | 0.9, 0.1                                           |
| $g_{PV,E}^{LR}, g_{SST,E}^{LR}, g_{VIP,E}^{LR}$                                | Long-range I targets              | 0.31, 0.22, 0.47                                   |
| $g_{PV,E}^{LR,FEF}, g_{SST,E}^{LR,FEF}, g_{VIP,E}^{LR,FEF}$                    | Long-range I targets FEF          | 0.2, 0.1, 0.7                                      |
| $b^o, c^o$                                                                     | D1 occupancy                      | 2, 1                                               |
| $b^N, c^N, \alpha$                                                             | DA-NMDA modulation                | 0.35, 10, 0.6                                      |
| $b^M, c^M, g_E^m, g_I^m$                                                       | DA-M current                      | 0.85, 14, -0.5, 0                                  |
| $\mu^{E,E}, \mu^{I,E}$                                                         | Long-range connectivity           | 1.45, 2.24                                         |
| $I^{stim}$                                                                     | target/distractor stimulus        | 0.1nA (main figures),<br>0.2nA (Figs S2 and S3)    |

813

## 814 **Acknowledgements**

815 This project was funded by (NIH/BMBF) CRCNS grant (nos. R01MH122024 and 01GQ1902) to NPG and XJW; NIH  
816 grant R01MH062349, ONR grant N00014 and James Simons foundation grant 543057SPI to XJW and the European  
817 Union’s Horizon 2020 Framework Programme for Research and Innovation under the Specific Grant Agreements  
818 785907 (Human Brain Project SGA2) and 945539 (Human Brain Project SGA3) to KZ and NPG. The authors would  
819 like to dedicate this manuscript to Prof. Karl Zilles, who was an inspiring mentor, colleague and friend. Prof. Zilles  
820 passed away earlier this year.

## 821 **Data and code availability**

822 Upon acceptance for publication, we will make the autoradiography data available in table format. Additionally, we  
823 will publish the surface representation of all anatomical data used in the paper, and the corresponding cortical atlases to  
824 the BALS neuroimaging website. All code used to produce the model and figures will be published on GitHub.

## 825 **Author contributions**

826 Conceptualization - SFW, XJW. Methodology - SFW, DB, XD, KK, HK, KZ, NPG, XJW. Software - SFW. Validation -  
827 SFW, NPG, DB, XD, KZ, XJW. Formal Analysis - SFW. Investigation - NPG, LJR, MQ, HK, KZ. Resources - NPG,  
828 KK, HK, KZ, XJW. Writing - original draft preparation - SFW. Writing - review and editing - all authors. Visualization  
829 - SFW. Supervision - NPG, KZ, XJW. Funding acquisition - SFW, NPG, KK, HK, KZ, XJW.

## 830 **References**

- 831 Abbas, Atheir I., Marina J. M. Sundiang, Britt Henoch, Mitchell P. Morton, Scott S. Bolkan, Alan J. Park, Alexander Z.  
832 Harris, Christoph Kellendonk, and Joshua A. Gordon (2018). “Somatostatin interneurons facilitate hippocampal-  
833 prefrontal synchrony and prefrontal spatial encoding”. *Neuron* 100.4, 926–939.e3.
- 834 Abbott, Larry F. and Frances S. Chance (2005). “Drivers and modulators from push-pull and balanced synaptic input”.  
835 In: *Progress in Brain Research*. Vol. 149. Cortical Function: a View from the Thalamus. Elsevier, pp. 147–155.
- 836 Abi-Dargham, Anissa, Osama Mawlawi, Ilise Lombardo, Roberto Gil, Diana Martinez, Yiyun Huang, Dah-Ren  
837 Hwang, John Keilp, Lisa Kochan, Ronald Van Heertum, Jack M. Gorman, and Marc Laruelle (2002). “Prefrontal  
838 Dopamine D1 Receptors and Working Memory in Schizophrenia”. *Journal of Neuroscience* 22.9. Publisher: Society  
839 for Neuroscience Section: ARTICLE, pp. 3708–3719.
- 840 Adesnik, Hillel, William Bruns, Hiroki Taniguchi, Z. Josh Huang, and Massimo Scanziani (2012). “A neural circuit for  
841 spatial summation in visual cortex”. *Nature* 490.7419, p. 226.
- 842 Ali, Afia B. and Alex M. Thomson (2008). “Synaptic  $\alpha 5$  subunit-containing GABAA receptors mediate IPSPs elicited  
843 by dendrite-preferring cells in rat neocortex”. *Cerebral Cortex* 18.6, pp. 1260–1271.
- 844 Allen, Micah, Davide Poggiali, Kirstie Whitaker, Tom Rhys Marshall, and Rogier A. Kievit (2019). “Raincloud plots: a  
845 multi-platform tool for robust data visualization”. *Wellcome open research* 4. Publisher: The Wellcome Trust.

- 846 Arnatkeviciute, Aurina, Ben D. Fulcher, and Alex Fornito (2019). “A practical guide to linking brain-wide gene  
847 expression and neuroimaging data”. *NeuroImage* 189, pp. 353–367.
- 848 Arnsten, Amy F. T., Lu E. Jin, Nao J. Gamo, Brian Ramos, Constantinos D. Paspalas, Yury M. Morozov, Anna Kata,  
849 Nigel S. Bamford, Mark F. Yeckel, Leonard K. Kaczmarek, and Lynda El-Hassar (2019). “Role of KCNQ potassium  
850 channels in stress-induced deficit of working memory”. *Neurobiology of Stress* 11, p. 100187.
- 851 Atlan, Gal, Anna Terem, Noa Peretz-Rivlin, Kamini Sehrawat, Ben Jerry Gonzales, Guy Pozner, Gen-ichi Tasaka,  
852 Yael Goll, Ron Refaeli, Ori Zviran, Byung Kook Lim, Maya Groysman, Inbal Goshen, Adi Mizrahi, Israel Nelken,  
853 and Ami Citri (2018). “The claustrum supports resilience to distraction”. *Current Biology* 28.17, 2752–2762.e7.
- 854 Bacci, Alberto, Uwe Rudolph, John R. Huguenard, and David A. Prince (2003). “Major differences in inhibitory  
855 synaptic transmission onto two neocortical interneuron subclasses”. *Journal of Neuroscience* 23.29, pp. 9664–9674.
- 856 Barbosa, Joao, Heike Stein, Rebecca L. Martinez, Adrià Galan-Gadea, Sihai Li, Josep Dalmau, Kirsten C. S. Adam,  
857 Josep Valls-Solé, Christos Constantinidis, and Albert Compte (2020). “Interplay between persistent activity and  
858 activity-silent dynamics in the prefrontal cortex underlies serial biases in working memory”. *Nature Neuroscience*.  
859 Publisher: Nature Publishing Group, pp. 1–9.
- 860 Barone, Pascal, Alexandre Batardiere, Kenneth Knoblauch, and Henry Kennedy (2000). “Laminar distribution of  
861 neurons in extrastriate areas projecting to visual areas V1 and V4 correlates with the hierarchical rank and indicates  
862 the operation of a distance rule”. *Journal of Neuroscience* 20.9, pp. 3263–3281.
- 863 Beck, Pamela D. and Jon H. Kaas (1999). “Cortical connections of the dorsomedial visual area in Old World macaque  
864 monkeys”. *Journal of Comparative Neurology* 406.4, pp. 487–502.
- 865 Bliss, Daniel P. and Mark D’Esposito (2017). “Synaptic augmentation in a cortical circuit model reproduces serial  
866 dependence in visual working memory”. *PLOS ONE* 12.12. Publisher: Public Library of Science, e0188927.
- 867 Braver, Todd S and Jonathan D Cohen (2000). “On the control of control: the role of dopamine in regulating prefrontal  
868 function and working memory”. In: *Control of Cognitive Processes. Attention and Performance XVIII*, pp. 713–737.
- 869 Brozoski, Thomas J., Roger M. Brown, H. E. Rosvold, and Patricia S. Goldman (1979). “Cognitive deficit caused by  
870 regional depletion of dopamine in prefrontal cortex of rhesus monkey”. *Science* 205.4409, pp. 929–932.
- 871 Brunel, Nicolas and Xiao-Jing Wang (2001). “Effects of neuromodulation in a cortical network model of object working  
872 memory dominated by recurrent inhibition”. *Journal of Computational Neuroscience* 11.1, pp. 63–85.
- 873 Carter, Eugene and Xiao-Jing Wang (2007). “Cannabinoid-Mediated Disinhibition and Working Memory: Dynamical  
874 Interplay of Multiple Feedback Mechanisms in a Continuous Attractor Model of Prefrontal Cortex”. *Cerebral Cortex*  
875 17.suppl\_1. Publisher: Oxford Academic, pp. i16–i26.
- 876 Cass, Wayne A. and Greg A. Gerhardt (1995). “In vivo assessment of dopamine uptake in rat medial prefrontal cortex:  
877 comparison with dorsal striatum and nucleus accumbens”. *Journal of Neurochemistry* 65.1, pp. 201–207.
- 878 Cassidy, Clifford M., Jared X. Van Snellenberg, Caridad Benavides, Mark Slifstein, Zhishun Wang, Holly Moore,  
879 Anissa Abi-Dargham, and Guillermo Horga (2016). “Dynamic connectivity between brain networks supports working  
880 memory: relationships to dopamine release and schizophrenia”. *Journal of Neuroscience* 36.15, pp. 4377–4388.
- 881 Cavada, Carmen and Patricia S. Goldman-Rakic (1989). “Posterior parietal cortex in rhesus monkey: I. Parcellation of  
882 areas based on distinctive limbic and sensory corticocortical connections”. *Journal of Comparative Neurology* 287.4,  
883 pp. 393–421.

- 884 Cerkevich, Christina M., Hui-Xin Qi, and Jon H. Kaas (2014). “Corticocortical projections to representations of the teeth,  
885 tongue, and face in somatosensory area 3b of macaques”. *Journal of Comparative Neurology* 522.3, pp. 546–572.
- 886 Chaudhuri, Rishidev, Kenneth Knoblauch, Marie-Alice Gariel, Henry Kennedy, and Xiao-Jing Wang (2015). “A  
887 large-scale circuit mechanism for hierarchical dynamical processing in the primate cortex”. *Neuron* 88.2, pp. 419–  
888 431.
- 889 Christophel, Thomas B., P. Christiaan Klink, Bernhard Spitzer, Pieter R. Roelfsema, and John-Dylan Haynes (2017).  
890 “The Distributed Nature of Working Memory”. *Trends in Cognitive Sciences* 21.2, pp. 111–124.
- 891 Cohen, Jeremiah Y., Sebastian Haesler, Linh Vong, Bradford B. Lowell, and Naoshige Uchida (2012). “Neuron-type-  
892 specific signals for reward and punishment in the ventral tegmental area”. *Nature* 482.7383. Number: 7383 Publisher:  
893 Nature Publishing Group, pp. 85–88.
- 894 Collins, Christine E., David C. Airey, Nicole A. Young, Duncan B. Leitch, and Jon H. Kaas (2010). “Neuron densities  
895 vary across and within cortical areas in primates”. *Proceedings of the National Academy of Sciences* 107.36,  
896 pp. 15927–15932.
- 897 Cools, Roshan and Mark D’Esposito (2011). “Inverted-U-shaped dopamine actions on human working memory and  
898 cognitive control”. *Biological psychiatry* 69.12, e113–e125.
- 899 Courtney, Susan M., Leslie G. Ungerleider, Katrina Keil, and James V. Haxby (1997). “Transient and sustained activity  
900 in a distributed neural system for human working memory”. *Nature* 386.6625. Number: 6625 Publisher: Nature  
901 Publishing Group, pp. 608–611.
- 902 DeFelipe, Javier, Stewart H. C. Hendry, and Edward G. Jones (1989). “Synapses of double bouquet cells in monkey  
903 cerebral cortex visualized by calbindin immunoreactivity”. *Brain Research* 503.1, pp. 49–54.
- 904 Dehaene, Stanislas and Jean-Pierre Changeux (2011). “Experimental and theoretical approaches to conscious process-  
905 ing”. *Neuron* 70.2, pp. 200–227.
- 906 Dehaene, Stanislas, Michel Kerszberg, and Jean-Pierre Changeux (1998). “A neuronal model of a global workspace in  
907 effortful cognitive tasks”. *Proceedings of the National Academy of Sciences* 95.24, pp. 14529–14534.
- 908 Dehaene, Stanislas, Claire Sergent, and Jean-Pierre Changeux (2003). “A neuronal network model linking subjective  
909 reports and objective physiological data during conscious perception”. *Proceedings of the National Academy of*  
910 *Sciences* 100.14, pp. 8520–8525.
- 911 Donahue, C. J., S. N. Sotiropoulos, S. Jbabdi, M. Hernandez-Fernandez, T. E. Behrens, T. B. Dyrby, T. Coalson,  
912 H. Kennedy, K. Knoblauch, D. C. Van Essen, and M. F. Glasser (2016). “Using diffusion tractography to predict  
913 cortical connection strength and distance: a quantitative comparison with tracers in the monkey”. *J. Neurosci.* 36,  
914 pp. 6758–6770.
- 915 Dotson, Nicholas M., Steven J. Hoffman, Baldwin Goodell, and Charles M. Gray (2018). “Feature-Based Visual  
916 Short-Term Memory Is Widely Distributed and Hierarchically Organized”. *Neuron* 99.1, 215–226.e4.
- 917 Dunning, Darren L., Briony Westgate, and Anna-Lynne R. Adlam (2016). “A meta-analysis of working memory  
918 impairments in survivors of moderate-to-severe traumatic brain injury”. *Neuropsychology* 30.7, pp. 811–819.
- 919 Durstewitz, Daniel, Jeremy K. Seamans, and Terrence J. Sejnowski (2000). “Dopamine-mediated stabilization of  
920 delay-period activity in a network model of prefrontal cortex”. *Journal of Neurophysiology* 83.3, pp. 1733–1750.

- 921 Egerton, Alice, Arsime Demjaha, Philip McGuire, Mitul A. Mehta, and Oliver D. Howes (2010). “The test–retest  
922 reliability of 18F-DOPA PET in assessing striatal and extrastriatal presynaptic dopaminergic function”. *NeuroImage*  
923 50.2, pp. 524–531.
- 924 Elston, Guy N. (2000). “Pyramidal cells of the frontal lobe: all the more spinous to think with”. *Journal of Neuroscience*  
925 20.18, RC95–RC95.
- 926 – (2007). “Specialization of the neocortical pyramidal cell during primate evolution”. In: *Evolution of Nervous Systems*.  
927 Elsevier, pp. 191–242.
- 928 Elston, Guy N., Ruth Benavides-Piccione, and Javier DeFelipe (2001). “The pyramidal cell in cognition: a comparative  
929 study in human and monkey”. *Journal of Neuroscience* 21.17, RC163–RC163.
- 930 – (2005). “A study of pyramidal cell structure in the cingulate cortex of the macaque monkey with comparative notes  
931 on inferotemporal and primary visual cortex”. *Cerebral Cortex* 15.1, pp. 64–73.
- 932 Elston, Guy N., Ruth Benavides-Piccione, Alejandra Elston, Paul Manger, and Javier Defelipe (2011a). “Pyramidal cells  
933 in prefrontal cortex of primates: marked differences in neuronal structure among species”. *Frontiers in Neuroanatomy*  
934 5.
- 935 Elston, Guy N., Tomofumi Oga, and Ichiro Fujita (2009). “Spinogenesis and pruning scales across functional hierar-  
936 chies”. *Journal of Neuroscience* 29.10, pp. 3271–3275.
- 937 Elston, Guy N., Tomofumi Oga, Tsuguhisa Okamoto, and Ichiro Fujita (2011b). “Spinogenesis and pruning in the  
938 anterior ventral inferotemporal cortex of the macaque monkey: an intracellular injection study of layer iii pyramidal  
939 cells”. *Frontiers in Neuroanatomy* 5.
- 940 Elston, Guy N., Tsuguhisa Okamoto, Tomofumi Oga, Dimity Dornan, and Ichiro Fujita (2010). “Spinogenesis and  
941 pruning in the primary auditory cortex of the macaque monkey (*Macaca fascicularis*): an intracellular injection study  
942 of layer III pyramidal cells”. *Brain Research* 1316, pp. 35–42.
- 943 Elston, Guy N. and Kathleen S. Rockland (2002). “The pyramidal cell of the sensorimotor cortex of the macaque  
944 monkey: phenotypic variation”. *Cerebral Cortex* 12.10, pp. 1071–1078.
- 945 Elston, Guy N. and M. G. Rosa (1997). “The occipitoparietal pathway of the macaque monkey: comparison of pyramidal  
946 cell morphology in layer III of functionally related cortical visual areas.” *Cerebral Cortex* 7.5, pp. 432–452.
- 947 – (1998a). “Complex dendritic fields of pyramidal cells in the frontal eye field of the macaque monkey: comparison  
948 with parietal areas 7a and LIP”. *NeuroReport* 9.1, p. 127.
- 949 – (1998b). “Morphological variation of layer III pyramidal neurones in the occipitotemporal pathway of the macaque  
950 monkey visual cortex.” *Cerebral Cortex* 8.3, pp. 278–294.
- 951 Elston, Guy N., Rowan Tweedale, and M. G. Rosa (1999). “Cortical integration in the visual system of the macaque  
952 monkey: large-scale morphological differences in the pyramidal neurons in the occipital, parietal and temporal lobes”.  
953 *Proceedings of the Royal Society of London B: Biological Sciences* 266.1426, pp. 1367–1374.
- 954 Engel, Tatiana A. and Xiao-Jing Wang (2011). “Same or different? A neural circuit mechanism of similarity-based  
955 pattern match decision making”. *Journal of Neuroscience* 31.19, pp. 6982–6996.
- 956 Fallon, Sean James, Rozemarijn Margaretha Mattiesing, Kinan Muhammed, Sanjay Manohar, and Masud Husain  
957 (2017). “Fractionating the neurocognitive mechanisms underlying working memory: Independent effects of dopamine  
958 and Parkinson’s disease”. *Cerebral Cortex* 27.12, pp. 5727–5738.

- 959 Fallon, Sean James, Marieke E. van der Schaaf, Niels ter Huurne, and Roshan Cools (2016). “The neurocognitive cost  
960 of enhancing cognition with methylphenidate: improved distractor resistance but impaired updating”. *Journal of*  
961 *Cognitive Neuroscience* 29.4, pp. 652–663.
- 962 Farde, Lars, Stefan Pauli, Håkan Hall, Lars Eriksson, Christer Halldin, Thomas Högberg, Lars Nilsson, Irene Sjögren,  
963 and Sharon Stone-Elander (1988). “Stereoselective binding of 11C-raclopride in living human brain — a search for  
964 extrastriatal central D2-dopamine receptors by PET”. *Psychopharmacology* 94.4, pp. 471–478.
- 965 Felleman, Daniel J. and David C. Van Essen (1991). “Distributed hierarchical processing in the primate cerebral cortex.”  
966 *Cerebral cortex* 1.1, pp. 1–47.
- 967 Frank, Michael J. (2005). “Dynamic dopamine modulation in the basal ganglia: a neurocomputational account of  
968 cognitive deficits in medicated and nonmedicated parkinsonism”. *Journal of Cognitive Neuroscience* 17.1, pp. 51–72.
- 969 Froudust-Walsh, Sean, Michael AP Bloomfield, Mattia Veronese, Jasmin Kroll, Vyacheslav R. Karolis, Sameer Jauhar,  
970 Ilaria Bonoldi, Philip K. McGuire, Shitij Kapur, Robin M. Murray, Chiara Nosarti, and Oliver Howes (2017a). “The  
971 effect of perinatal brain injury on dopaminergic function and hippocampal volume in adult life”. *eLife* 6, e29088.
- 972 Froudust-Walsh, Sean, Diana López-Barroso, María José Torres-Prioris, Paula Croxson, and Marcelo L. Berthier  
973 (2017b). “Plasticity in the working memory system: life span changes and response to injury”. *The Neuroscientist*,  
974 p. 1073858417717210.
- 975 Funahashi, Shintaro, Charles J. Bruce, and Patricia S. Goldman-Rakic (1989). “Mnemonic coding of visual space in the  
976 monkey’s dorsolateral prefrontal cortex”. *Journal of Neurophysiology* 61.2, pp. 331–349.
- 977 Fuster, J M (1973). “Unit activity in prefrontal cortex during delayed-response performance: neuronal correlates of  
978 transient memory.” *Journal of Neurophysiology* 36.1. Publisher: American Physiological Society, pp. 61–78.
- 979 Gallyas, Ferenc (1979). “Silver staining of myelin by means of physical development”. *Neurological Research* 1.2,  
980 pp. 203–209.
- 981 Gamo, Nao J., Gyorgy Lur, Michael J. Higley, Min Wang, Constantinos D. Paspalas, Susheel Vijayraghavan, Yang  
982 Yang, Brian P. Ramos, Kathy Peng, Anna Kata, Lindsay Boven, Faith Lin, Lisette Roman, Daeyeol Lee, and  
983 Amy F. T. Arnsten (2015). “Stress impairs prefrontal cortical function via d1 dopamine receptor interactions with  
984 hyperpolarization-activated cyclic nucleotide-gated channels”. *Biological Psychiatry. Mechanisms of Stress, Memory,*  
985 *and Posttraumatic Stress Disorder* 78.12, pp. 860–870.
- 986 Gao, Wen-Jun, Yun Wang, and Patricia S. Goldman-Rakic (2003). “Dopamine modulation of perisomatic and periden-  
987 dritic inhibition in prefrontal cortex”. *Journal of Neuroscience* 23.5, pp. 1622–1630.
- 988 Garris, P. A. and R. M. Wightman (1994). “Different kinetics govern dopaminergic transmission in the amygdala,  
989 prefrontal cortex, and striatum: an in vivo voltammetric study”. *Journal of Neuroscience* 14.1, pp. 442–450.
- 990 George, Meena S., L. F. Abbott, and Steven A. Siegelbaum (2009). “HCN hyperpolarization-activated cation channels  
991 inhibit EPSPs by interactions with M-type K + channels”. *Nature Neuroscience* 12.5, pp. 577–584.
- 992 Goldman-Rakic, Patricia S. (1995). “Cellular basis of working memory”. *Neuron* 14.3, pp. 477–485.
- 993 Goldman-Rakic, Patricia S., M. S. Lidow, and D. W. Gallager (1990). “Overlap of dopaminergic, adrenergic, and  
994 serotonergic receptors and complementarity of their subtypes in primate prefrontal cortex”. *Journal of Neuroscience*  
995 10.7, pp. 2125–2138.



- 996 Guo, Zengcai V., Hidehiko K. Inagaki, Kayvon Daie, Shaul Druckmann, Charles R. Gerfen, and Karel Svoboda (2017).  
997 “Maintenance of persistent activity in a frontal thalamocortical loop”. *Nature* 545.7653. Number: 7653 Publisher:  
998 Nature Publishing Group, pp. 181–186.
- 999 Harnett, Mark T., Brian E. Bernier, Kee-Chan Ahn, and Hitoshi Morikawa (2009). “Burst-Timing-Dependent Plasticity  
1000 of NMDA Receptor-Mediated Transmission in Midbrain Dopamine Neurons”. *Neuron* 62.6, pp. 826–838.
- 1001 Helmstaedter, Moritz, Bert Sakmann, and Dirk Feldmeyer (2009). “Neuronal correlates of local, lateral, and translaminar  
1002 inhibition with reference to cortical columns”. *Cerebral Cortex* 19.4, pp. 926–937.
- 1003 Hempel, Chris M., Kenichi H. Hartman, X.-J. Wang, Gina G. Turrigiano, and Sacha B. Nelson (2000). “Multiple Forms  
1004 of Short-Term Plasticity at Excitatory Synapses in Rat Medial Prefrontal Cortex”. *Journal of Neurophysiology* 83.5.  
1005 Publisher: American Physiological Society, pp. 3031–3041.
- 1006 Impieri, Daniele, Karl Zilles, Meiqi Niu, Lucija Rapan, Nicole Schubert, Claudio Galletti, and Nicola Palomero-  
1007 Gallagher (2019). “Receptor density pattern confirms and enhances the anatomic-functional features of the macaque  
1008 superior parietal lobule areas”. *Brain Structure and Function* 224.8, pp. 2733–2756.
- 1009 Jacob, Simon N., Maximilian Stalter, and Andreas Nieder (2016). “Cell-type-specific modulation of targets and  
1010 distractors by dopamine D1 receptors in primate prefrontal cortex”. *Nature Communications* 7, p. 13218.
- 1011 Jiang, Xiaolong, Shan Shen, Cathryn R. Cadwell, Philipp Berens, Fabian Sinz, Alexander S. Ecker, Saumil Patel, and  
1012 Andreas S. Tolias (2015). “Principles of connectivity among morphologically defined cell types in adult neocortex”.  
1013 *Science* 350.6264, aac9462.
- 1014 Kaas, Jon H. (2004). “Somatosensory system”. *The Human Nervous System*, pp. 1059–1092.
- 1015 Kalisman, Nir, Gilad Silberberg, and Henry Markram (2005). “The neocortical microcircuit as a tabula rasa”. *Proceed-*  
1016 *ings of the National Academy of Sciences* 102.3, pp. 880–885.
- 1017 Kamiński, Jan and Ueli Rutishauser (2020). “Between persistently active and activity-silent frameworks: novel vistas  
1018 on the cellular basis of working memory”. *Annals of the New York Academy of Sciences* 1464.1, pp. 64–75.
- 1019 Kawaguchi, Yasuo (1993). “Groupings of nonpyramidal and pyramidal cells with specific physiological and morpholog-  
1020 ical characteristics in rat frontal cortex”. *Journal of Neurophysiology* 69.2, pp. 416–431.
- 1021 – (1995). “Physiological subgroups of nonpyramidal cells with specific morphological characteristics in layer II/III of  
1022 rat frontal cortex”. *Journal of Neuroscience* 15.4, pp. 2638–2655.
- 1023 Kennedy, Henry, Kenneth Knoblauch, and Zoltán Toroczkai (2013). “Why data coherence and quality is critical for  
1024 understanding interareal cortical networks”. *NeuroImage. Mapping the Connectome* 80, pp. 37–45.
- 1025 Konecky, R. O., M. A. Smith, and C. R. Olson (2017). “Monkey prefrontal neurons during Sternberg task performance:  
1026 full contents of working memory or most recent item?” *Journal of Neurophysiology* 117.6. Publisher: American  
1027 Physiological Society, pp. 2269–2281.
- 1028 Laruelle, Marc, Anissa Abi-Dargham, Christopher H. van Dyck, Roberto Gil, Cyril D. D’Souza, Joseph Erdos, Elinore  
1029 McCance, William Rosenblatt, Christine Fingado, Sami S. Zoghbi, Ronald M. Baldwin, John P. Seibyl, John  
1030 H. Krystal, Dennis S. Charney, and Robert B. Innis (1996). “Single photon emission computerized tomography  
1031 imaging of amphetamine-induced dopamine release in drug-free schizophrenic subjects”. *Proceedings of the National*  
1032 *Academy of Sciences* 93.17, pp. 9235–9240.
- 1033 Leavitt, Matthew L., Diego Mendoza-Halliday, and Julio C. Martinez-Trujillo (2017). “Sustained Activity Encoding  
1034 Working Memories: Not Fully Distributed”. *Trends in Neurosciences* 40.6, pp. 328–346.

- 1035 Lee, Soohyun, Illya Kruglikov, Z. Josh Huang, Gord Fishell, and Bernardo Rudy (2013). “A disinhibitory circuit  
1036 mediates motor integration in the somatosensory cortex”. *Nature Neuroscience* 16.11, pp. 1662–1670.
- 1037 Lidow, Michael S., Patricia S. Goldman-Rakic, D. W. Gallager, and Pasko Rakic (1991). “Distribution of dopaminergic  
1038 receptors in the primate cerebral cortex: Quantitative autoradiographic analysis using [3H]raclopride, [3H]spiperone  
1039 and [3H]SCH23390”. *Neuroscience* 40.3, pp. 657–671.
- 1040 Liu, Xu, Steve Ramirez, Petti T. Pang, Corey B. Puryear, Arvind Govindarajan, Karl Deisseroth, and Susumu Tonegawa  
1041 (2012). “Optogenetic stimulation of a hippocampal engram activates fear memory recall”. *Nature* 484.7394. Number:  
1042 7394 Publisher: Nature Publishing Group, pp. 381–385.
- 1043 Lu, Jiang-teng, Cheng-yu Li, Jian-Ping Zhao, Mu-ming Poo, and Xiao-hui Zhang (2007). “Spike-timing-dependent  
1044 plasticity of neocortical excitatory synapses on inhibitory interneurons depends on target cell type”. *Journal of*  
1045 *Neuroscience* 27.36, pp. 9711–9720.
- 1046 Ma, Yunyong, Hang Hu, and Ariel Agmon (2012). “Short-term plasticity of unitary inhibitory-to-inhibitory synapses  
1047 depends on the presynaptic interneuron subtype”. *Journal of Neuroscience* 32.3, pp. 983–988.
- 1048 Markov, Nikola T., Mária Ercsey-Ravasz, David C. Van Essen, Kenneth Knoblauch, Zoltán Toroczkai, and Henry  
1049 Kennedy (2013). “Cortical high-density counterstream architectures”. *Science* 342.6158, p. 1238406.
- 1050 Markov, Nikola T., Julien Vezoli, Pascal Chameau, Arnaud Falchier, René Quilodran, Cyril Huissoud, Camille Lamy,  
1051 Pierre Misery, Pascale Giroud, Shimon Ullman, Pascal Barone, Colette Dehay, Kenneth Knoblauch, and Henry  
1052 Kennedy (2014a). “Anatomy of hierarchy: Feedforward and feedback pathways in macaque visual cortex”. *Journal*  
1053 *of Comparative Neurology* 522.1. \_eprint: <https://onlinelibrary.wiley.com/doi/pdf/10.1002/cne.23458>, pp. 225–259.
- 1054 Markov, Nikola T. et al. (2014b). “A weighted and directed interareal connectivity matrix for macaque cerebral cortex”.  
1055 *Cerebral Cortex* 24.1, pp. 17–36.
- 1056 Markram, Henry, Joachim Lübke, Michael Frotscher, Arnd Roth, and Bert Sakmann (1997). “Physiology and anatomy  
1057 of synaptic connections between thick tufted pyramidal neurones in the developing rat neocortex.” *The Journal of*  
1058 *Physiology* 500.2, pp. 409–440.
- 1059 Marlin, Joseph J. and Adam G. Carter (2014). “Gaba-a receptor inhibition of local calcium signaling in spines and  
1060 dendrites”. *Journal of Neuroscience* 34.48, pp. 15898–15911.
- 1061 Mashour, George A., Pieter Roelfsema, Jean-Pierre Changeux, and Stanislas Dehaene (2020). “Conscious Processing  
1062 and the Global Neuronal Workspace Hypothesis”. *Neuron* 105.5, pp. 776–798.
- 1063 Masse, Nicolas Y., Matthew C. Rosen, and David J. Freedman (2020). “Reevaluating the Role of Persistent Neural  
1064 Activity in Short-Term Memory”. *Trends in Cognitive Sciences* 24.3, pp. 242–258.
- 1065 Masse, Nicolas Y., Guangyu R. Yang, H. Francis Song, Xiao-Jing Wang, and David J. Freedman (2019). “Circuit  
1066 mechanisms for the maintenance and manipulation of information in working memory”. *Nature Neuroscience* 22.7,  
1067 pp. 1159–1167.
- 1068 Mejias, Jorge F., John D. Murray, Henry Kennedy, and Xiao-Jing Wang (2016). “Feedforward and feedback frequency-  
1069 dependent interactions in a large-scale laminar network of the primate cortex”. *Science Advances* 2.11, e1601335.
- 1070 Mejias, Jorge F. and Xiao-Jing Wang (2019). “Mechanisms of distributed working memory in a large-scale model of  
1071 the macaque neocortex”. *bioRxiv*. Publisher: Cold Spring Harbor Laboratory Section: New Results, p. 760231.

- 1072 Mendonça, Philippe RF, Mariana Vargas-Caballero, Ferenc Erdélyi, Gábor Szabó, Ole Paulsen, and Hugh PC Robinson  
1073 (2016). “Stochastic and deterministic dynamics of intrinsically irregular firing in cortical inhibitory interneurons”.  
1074 *eLife* 5. Ed. by Frances K Skinner, e16475.
- 1075 Merker, Björn (1983). “Silver staining of cell bodies by means of physical development”. *Journal of Neuroscience*  
1076 *Methods* 9.3, pp. 235–241.
- 1077 Mongillo, Gianluigi, Omri Barak, and Misha Tsodyks (2008). “Synaptic Theory of Working Memory”. *Science*  
1078 319.5869. Publisher: American Association for the Advancement of Science Section: Report, pp. 1543–1546.
- 1079 Mueller, Adrienne, Rebecca M. Krock, Steven Shepard, and Tirin Moore (2019). “Dopamine receptor expression among  
1080 local and visual cortex-projecting frontal eye field neurons”. *Cerebral Cortex*, bhz–78.
- 1081 Muller, Arnaud, Victory Joseph, Paul A. Slesinger, and David Kleinfeld (2014). “Cell-based reporters reveal in vivo  
1082 dynamics of dopamine and norepinephrine release in murine cortex”. *Nature methods* 11.12, pp. 1245–1252.
- 1083 Mundorf, Michelle L., Joshua D. Joseph, C. Megan Austin, Marc G. Caron, and R. Mark Wightman (2001). “Cate-  
1084 cholamine release and uptake in the mouse prefrontal cortex”. *Journal of Neurochemistry* 79.1, pp. 130–142.
- 1085 Muñoz, William, Robin Tremblay, Daniel Levenstein, and Bernardo Rudy (2017). “Layer-specific modulation of  
1086 neocortical dendritic inhibition during active wakefulness”. *Science* 355.6328, pp. 954–959.
- 1087 Murriss, Sjoerd R., John T. Arsenault, and Wim Vanduffel (2020). “Frequency- and State-Dependent Network Effects of  
1088 Electrical Stimulation Targeting the Ventral Tegmental Area in Macaques”. *Cerebral Cortex* 30.8, pp. 4281–4296.
- 1089 Nimchinsky, Esther A., Bernardo L. Sabatini, and Karel Svoboda (2002). “Structure and function of dendritic spines”.  
1090 *Annual Review of Physiology* 64.1, pp. 313–353.
- 1091 Niu, Meiqi, Daniele Impieri, Lucija Rapan, Thomas Funck, Nicola Palomero-Gallagher, and Karl Zilles (2020).  
1092 “Receptor-driven, multimodal mapping of cortical areas in the macaque monkey intraparietal sulcus”. *eLife* 9. Ed. by  
1093 Timothy E Behrens and Wim Vanduffel. Publisher: eLife Sciences Publications, Ltd, e55979.
- 1094 Palomero-Gallagher, Nicola and Karl Zilles (2018). “Chapter 24 - Cyto- and receptor architectonic mapping of the  
1095 human brain”. In: *Handbook of Clinical Neurology*. Ed. by Ingeborg Huitinga and Maree J. Webster. Vol. 150. Brain  
1096 Banking. Elsevier, pp. 355–387.
- 1097 Pereira, Jacinto José Fonseca (2014). “Computational modeling of prefrontal cortex circuits: from neurons to networks”.  
1098 PhD Thesis. Universidade NOVA de Lisboa (Portugal).
- 1099 Pereira, Jacinto and Xiao-Jing Wang (2015). “A Tradeoff Between Accuracy and Flexibility in a Working Memory  
1100 Circuit Endowed with Slow Feedback Mechanisms”. *Cerebral Cortex* 25.10. Publisher: Oxford Academic, pp. 3586–  
1101 3601.
- 1102 Petreanu, Leopoldo, Tianyi Mao, Scott M. Sternson, and Karel Svoboda (2009). “The subcellular organization of  
1103 neocortical excitatory connections”. *Nature* 457.7233, pp. 1142–1145.
- 1104 Pettersson-Yeo, William, Paul Allen, Stefania Benetti, Philip McGuire, and Andrea Mechelli (2011). “Dysconnectivity  
1105 in schizophrenia: Where are we now?” *Neuroscience & Biobehavioral Reviews* 35.5, pp. 1110–1124.
- 1106 Pfeffer, Carsten K., Mingshan Xue, Miao He, Z. Josh Huang, and Massimo Scanziani (2013). “Inhibition of inhibition  
1107 in visual cortex: the logic of connections between molecularly distinct interneurons”. *Nature Neuroscience* 16.8,  
1108 pp. 1068–1076.

- 1109 Pouget, Pierre, Iwona Stepniewska, Erin A. Crowder, Melanie W. Leslie, Erik E. Emeric, Matthew J. Nelson, and  
1110 Jeffrey D. Schall (2009). “Visual and motor connectivity and the distribution of calcium-binding proteins in macaque  
1111 frontal eye field: implications for saccade target selection”. *Frontiers in Neuroanatomy* 3. Publisher: Frontiers.
- 1112 Preuss, Todd M. and Patricia S. Goldman-Rakic (1991). “Myelo- and cytoarchitecture of the granular frontal cortex and  
1113 surrounding regions in the strepsirhine primate Galago and the anthropoid primate Macaca”. *Journal of Comparative*  
1114 *Neurology* 310.4, pp. 429–474.
- 1115 Richfield, Eric K., Anne B. Young, and John B. Penney (1989). “Comparative distributions of dopamine D-1 and D-2  
1116 receptors in the cerebral cortex of rats, cats, and monkeys”. *Journal of Comparative Neurology* 286.4, pp. 409–426.
- 1117 Robbins, T.W. and A.F.T. Arnsten (2009). “The Neuropsychopharmacology of Fronto-Executive Function: Monoaminer-  
1118 gic Modulation”. *Annual Review of Neuroscience* 32.1. \_eprint: <https://doi.org/10.1146/annurev.neuro.051508.135535>,  
1119 pp. 267–287.
- 1120 Roffman, Joshua L., Alexandra S. Tanner, Hamdi Eryilmaz, Anais Rodriguez-Thompson, Noah J. Silverstein, New Fei  
1121 Ho, Adam Z. Nitenson, Daniel B. Chonde, Douglas N. Greve, and Anissa Abi-Dargham (2016). “Dopamine D 1  
1122 signaling organizes network dynamics underlying working memory”. *Science advances* 2.6, e1501672.
- 1123 Romo, Ranulfo, Carlos D. Brody, Adrián Hernández, and Luis Lemus (1999). “Neuronal correlates of parametric  
1124 working memory in the prefrontal cortex”. *Nature* 399.6735. Number: 6735 Publisher: Nature Publishing Group,  
1125 pp. 470–473.
- 1126 Romo, Ranulfo and Román Rossi-Pool (2020). “Turning Touch into Perception”. *Neuron* 105.1, pp. 16–33.
- 1127 Rose, Nathan S., Joshua J. LaRocque, Adam C. Riggall, Olivia Gosseries, Michael J. Starrett, Emma E. Meyering, and  
1128 Bradley R. Postle (2016). “Reactivation of latent working memories with transcranial magnetic stimulation”. *Science*  
1129 354.6316. Publisher: American Association for the Advancement of Science Section: Report, pp. 1136–1139.
- 1130 Schultz, Wolfram, Paul Apicella, and Tomas Ljungberg (1993). “Responses of monkey dopamine neurons to reward  
1131 and conditioned stimuli during successive steps of learning a delayed response task”. *Journal of Neuroscience* 13.3,  
1132 pp. 900–913.
- 1133 Schuman, Benjamin, Robert P. Machold, Yoshiko Hashikawa, János Fuzik, Gord J. Fishell, and Bernardo Rudy (2019).  
1134 “Four unique interneuron populations reside in neocortical layer 1”. *Journal of Neuroscience* 39.1, pp. 125–139.
- 1135 Schwanhäusser, Björn, Dorothea Busse, Na Li, Gunnar Dittmar, Johannes Schuchhardt, Jana Wolf, Wei Chen, and  
1136 Matthias Selbach (2011). “Global quantification of mammalian gene expression control”. *Nature* 473.7347, pp. 337–  
1137 342.
- 1138 Seamans, Jeremy K., Daniel Durstewitz, Brian R. Christie, Charles F. Stevens, and Terrence J. Sejnowski (2001a).  
1139 “Dopamine D1/D5 receptor modulation of excitatory synaptic inputs to layer V prefrontal cortex neurons”. *Proceed-*  
1140 *ings of the National Academy of Sciences* 98.1, pp. 301–306.
- 1141 Seamans, Jeremy K., Natalia Gorelova, Daniel Durstewitz, and Charles R. Yang (2001b). “Bidirectional dopamine  
1142 modulation of gabaergic inhibition in prefrontal cortical pyramidal neurons”. *Journal of Neuroscience* 21.10, pp. 3628–  
1143 3638.
- 1144 Seamans, Jeremy K. and Charles R. Yang (2004). “The principal features and mechanisms of dopamine modulation in  
1145 the prefrontal cortex”. *Progress in Neurobiology* 74.1, pp. 1–58.
- 1146 Silberberg, Gilad and Henry Markram (2007). “Disynaptic inhibition between neocortical pyramidal cells mediated by  
1147 martinotti cells”. *Neuron* 53.5, pp. 735–746.

- 1148 Slifstein, Mark, Elsmarieke van de Giessen, Jared Van Snellenberg, Judy L. Thompson, Rajesh Narendran, Roberto Gil,  
1149 Elizabeth Hackett, Ragy Girgis, Najate Ojeil, Holly Moore, Deepak D'Souza, Robert T. Malison, Yiyun Huang,  
1150 Keunpoong Lim, Nabeel Nabulsi, Richard E. Carson, Jeffrey A. Lieberman, and Anissa Abi-Dargham (2015).  
1151 “Deficits in prefrontal cortical and extrastriatal dopamine release in schizophrenia: a positron emission tomographic  
1152 functional magnetic resonance imaging study”. *JAMA Psychiatry* 72.4, pp. 316–324.
- 1153 Soden, Marta E., Amanda S. Chung, Beatriz Cuevas, Jesse M. Resnick, Rajeshwar Awatramani, and Larry S. Zweifel  
1154 (2020). “Anatomic resolution of neurotransmitter-specific projections to the VTA reveals diversity of GABAergic  
1155 inputs”. *Nature Neuroscience*. Publisher: Nature Publishing Group, pp. 1–13.
- 1156 Soltani, Alireza and Xiao-Jing Wang (2006). “A Biophysically Based Neural Model of Matching Law Behavior:  
1157 Melioration by Stochastic Synapses”. *Journal of Neuroscience* 26.14. Publisher: Society for Neuroscience Section:  
1158 Articles, pp. 3731–3744.
- 1159 Stokes, Mark G. (2015). “‘Activity-silent’ working memory in prefrontal cortex: a dynamic coding framework”. *Trends*  
1160 *in Cognitive Sciences* 19.7, pp. 394–405.
- 1161 Strang, Gilbert (1993). *Introduction to Linear Algebra*. Vol. 3. Wellesley-Cambridge Press Wellesley, MA.
- 1162 Suzuki, Mototaka and Jacqueline Gottlieb (2013). “Distinct neural mechanisms of distractor suppression in the frontal  
1163 and parietal lobe”. *Nature Neuroscience* 16.1, pp. 98–104.
- 1164 Tanaka, Shoji (1999). “Architecture and dynamics of the primate prefrontal cortical circuit for spatial working memory”.  
1165 *Neural Networks* 12.7, pp. 1007–1020.
- 1166 Tremblay, Robin, Soohyun Lee, and Bernardo Rudy (2016). “Gabaergic interneurons in the neocortex: from cellular  
1167 properties to circuits”. *Neuron* 91.2, pp. 260–292.
- 1168 Trübutschek, Darinka, Sébastien Marti, Andrés Ojeda, Jean-Rémi King, Yuanyuan Mi, Misha Tsodyks, and Stanislas  
1169 Dehaene (2017). “A theory of working memory without consciousness or sustained activity”. *eLife* 6. Ed. by Tatiana  
1170 Pasternak. Publisher: eLife Sciences Publications, Ltd, e23871.
- 1171 Trübutschek, Darinka, Sébastien Marti, Henrik Ueberschär, and Stanislas Dehaene (2019). “Probing the limits of  
1172 activity-silent non-conscious working memory”. *Proceedings of the National Academy of Sciences* 116.28, pp. 14358–  
1173 14367.
- 1174 Vijayraghavan, Susheel, Alex James Major, and Stefan Everling (2016). “Dopamine D1 and D2 receptors make  
1175 dissociable contributions to dorsolateral prefrontal cortical regulation of rule-guided oculomotor behavior”. *Cell*  
1176 *Reports* 16.3, pp. 805–816.
- 1177 Vijayraghavan, Susheel, Min Wang, Shari G. Birnbaum, Graham V. Williams, and Amy F. T. Arnsten (2007). “Inverted-  
1178 U dopamine D1 receptor actions on prefrontal neurons engaged in working memory”. *Nature Neuroscience* 10.3,  
1179 p. 376.
- 1180 Vugt, Bram van, Bruno Dagnino, Devavrat Vartak, Houman Safaai, Stefano Panzeri, Stanislas Dehaene, and Pieter R.  
1181 Roelfsema (2018). “The threshold for conscious report: Signal loss and response bias in visual and frontal cortex”.  
1182 *Science* 360.6388, pp. 537–542.
- 1183 Walker, Florian, Martin Möck, Michael Feyerabend, Julien Guy, Robin J. Wagener, Dirk Schubert, Jochen F. Staiger,  
1184 and Mirko Witte (2016). “Parvalbumin- and vasoactive intestinal polypeptide-expressing neocortical interneurons  
1185 impose differential inhibition on Martinotti cells”. *Nature Communications* 7, p. 13664.

- 1186 Wall, Nicholas R., Mauricio De La Parra, Jordan M. Sorokin, Hiroki Taniguchi, Z. Josh Huang, and Edward M. Callaway  
1187 (2016). “Brain-wide maps of synaptic input to cortical interneurons”. *Journal of Neuroscience* 36.14, pp. 4000–4009.
- 1188 Wang, Huai-Xing and Wen-Jun Gao (2009). “Cell Type-Specific Development of NMDA Receptors in the Interneurons  
1189 of Rat Prefrontal Cortex”. *Neuropsychopharmacology* 34.8. Number: 8 Publisher: Nature Publishing Group, pp. 2028–  
1190 2040.
- 1191 Wang, Min, Dibyadeep Datta, John Enwright, Veronica Galvin, Sheng-Tao Yang, Constantinos Paspalas, Rouba Kozak,  
1192 David L. Gray, David A. Lewis, and Amy F. T. Arnsten (2019). “A novel dopamine D1 receptor agonist excites delay-  
1193 dependent working memory-related neuronal firing in primate dorsolateral prefrontal cortex”. *Neuropharmacology*  
1194 150, pp. 46–58.
- 1195 Wang, Min, Yang Yang, Ching-Jung Wang, Nao J. Gamo, Lu E. Jin, James A. Mazer, John H. Morrison, Xiao-Jing  
1196 Wang, and Amy F. T. Arnsten (2013). “NMDA Receptors Subserve Persistent Neuronal Firing during Working  
1197 Memory in Dorsolateral Prefrontal Cortex”. *Neuron* 77.4, pp. 736–749.
- 1198 Wang, Xiao-Jing (1999). “Synaptic basis of cortical persistent activity: the importance of NMDA receptors to working  
1199 memory”. *Journal of Neuroscience* 19.21, pp. 9587–9603.
- 1200 – (2001). “Synaptic reverberation underlying mnemonic persistent activity”. *Trends in Neurosciences* 24.8, pp. 455–  
1201 463.
- 1202 – (2020). “Macroscopic gradients of synaptic excitation and inhibition in the neocortex”. *Nature Reviews Neuroscience*  
1203 21.3, pp. 169–178.
- 1204 Wang, Xiao-Jing, J. Tegner, C. Constantinidis, and Patricia S. Goldman-Rakic (2004a). “Division of labor among  
1205 distinct subtypes of inhibitory neurons in a cortical microcircuit of working memory”. *Proceedings of the National*  
1206 *Academy of Sciences* 101.5, pp. 1368–1373.
- 1207 Wang, Xiao-Jing and Guangyu Robert Yang (2018). “A disinhibitory circuit motif and flexible information routing in  
1208 the brain”. *Current Opinion in Neurobiology*. *Neurobiology of Behavior* 49, pp. 75–83.
- 1209 Wang, Yun, Maria Toledo-Rodriguez, Anirudh Gupta, Caizhi Wu, Gilad Silberberg, Junyi Luo,  
1210 and Henry Markram (2004b). “Anatomical, physiological and molecular properties of Martinotti  
1211 cells in the somatosensory cortex of the juvenile rat”. *The Journal of Physiology* 561.1. \_eprint:  
1212 <https://physoc.onlinelibrary.wiley.com/doi/pdf/10.1113/jphysiol.2004.073353>, pp. 65–90.
- 1213 Warden, Melissa R. and Earl K. Miller (2010). “Task-Dependent Changes in Short-Term Memory in the Prefrontal  
1214 Cortex”. *Journal of Neuroscience* 30.47. Publisher: Society for Neuroscience Section: Articles, pp. 15801–15810.
- 1215 Williams, Graham V. and Patricia S. Goldman-Rakic (1995). “Modulation of memory fields by dopamine D1 receptors  
1216 in prefrontal cortex”. *Nature* 376.6541, p. 572.
- 1217 Wolff, Michael J., Janina Jochim, Elkan G. Akyürek, and Mark G. Stokes (2017). “Dynamic hidden states underlying  
1218 working-memory-guided behavior”. *Nature Neuroscience* 20.6. Number: 6 Publisher: Nature Publishing Group,  
1219 pp. 864–871.
- 1220 Wong, Kong-Fatt and Xiao-Jing Wang (2006). “A recurrent network mechanism of time integration in perceptual  
1221 decisions”. *Journal of Neuroscience* 26.4, pp. 1314–1328.
- 1222 Yang, Guangyu Robert, John D. Murray, and Xiao-Jing Wang (2016). “A dendritic disinhibitory circuit mechanism for  
1223 pathway-specific gating”. *Nature Communications* 7.1. Number: 1 Publisher: Nature Publishing Group, p. 12815.

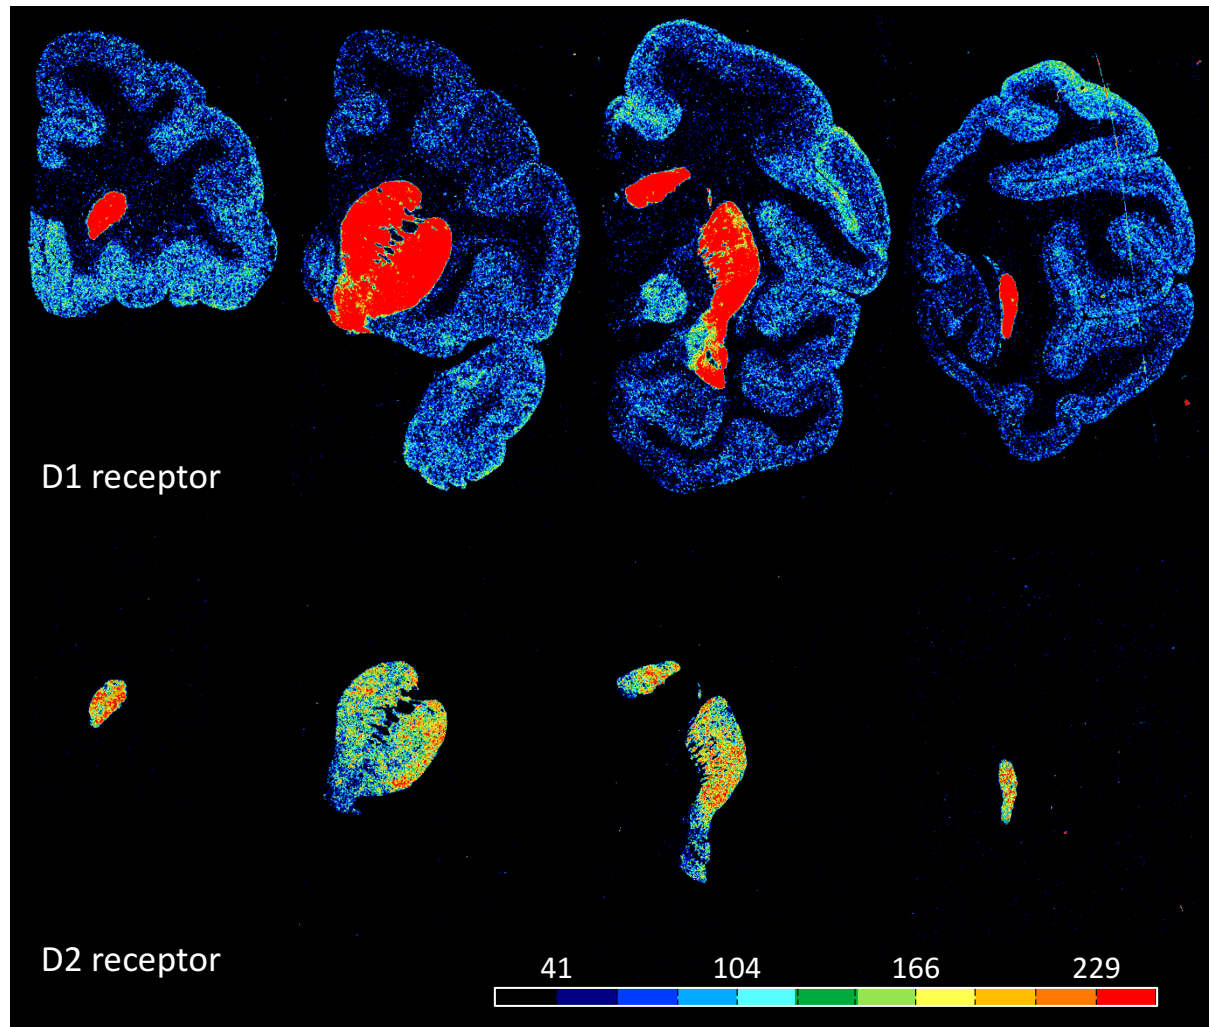

Figure S1: Exemplary coronal sections through the macaque brain and processed for visualization of dopamine D1 and D2 receptors by means of quantitative in-vitro receptor autoradiography. Note, that D2 receptor density in cortex is so low, that it is not detectable by means of the here applied method. Scale bar codes for receptor densities in fmol/mg protein.

- 1224 Zandvakili, Amin and Adam Kohn (2015). “Coordinated neuronal activity enhances corticocortical communication”.  
1225 *Neuron* 87.4, pp. 827–839.
- 1226 Zilles, Karl and Nicola Palomero-Gallagher (2017). “Multiple transmitter receptors in regions and layers of the human  
1227 cerebral cortex”. *Frontiers in Neuroanatomy* 11.
- 1228 Zilles, Karl, Axel Schleicher, Nicola Palomero-Gallagher, and Katrin Amunts (2002). “Quantitative analysis of cyto- and  
1229 receptor architecture of the human brain”. In: *Brain Mapping: The Methods (Second Edition)*. Elsevier, pp. 573–602.

1230 **Supplementary Material**

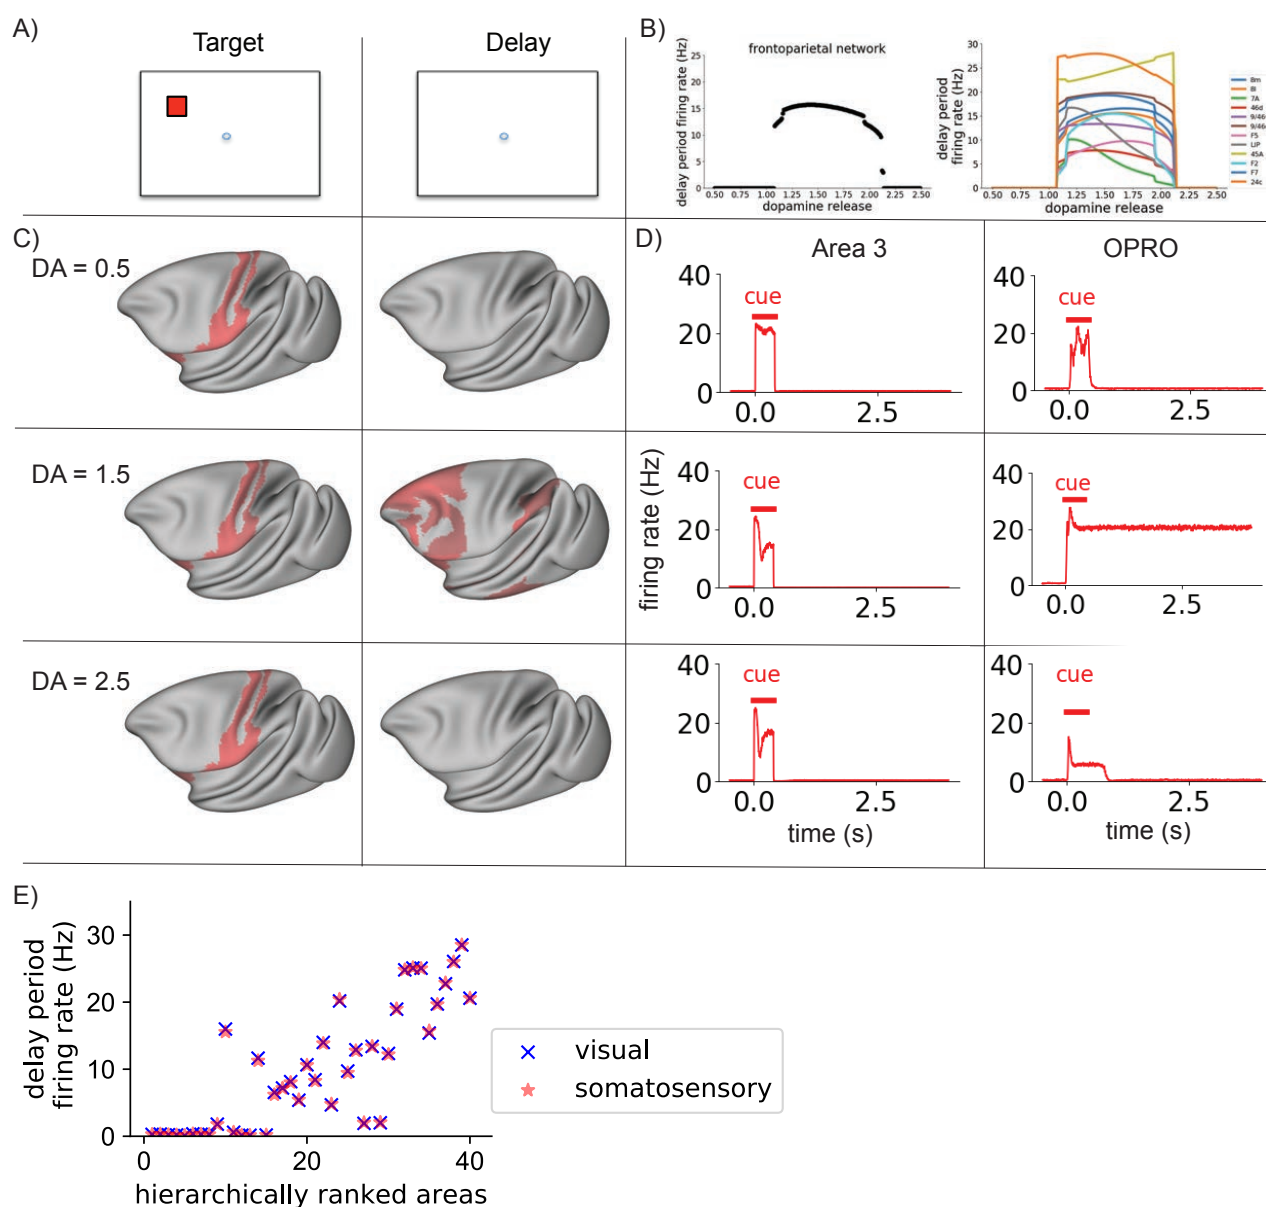

**Figure S2: Dopamine release enables distributed somatosensory working memory.** A) Structure of the task. The cortical network was presented with a stimulus, which it had to maintain through a delay period. The tactile stimulus is presented to primary somatosensory cortex (area 3). B, left) Mean firing rate in the frontoparietal network at the end of the delay period, for different levels of dopamine release. There is an inverted-U relationship between dopamine release and delay period activity across the frontoparietal network, as for visual working memory. B, right) Mean delay-period activity of cortical areas as a function of dopamine release. All areas shown display persistent activity in experiments (Leavitt et al. 2017). C) Activity is shown across the cortex at different stages in the working memory task (left to right), with increasing levels of dopamine release (from top to bottom). Red represents activity in the excitatory population sensitive to the location of the target stimulus. Very low or very high levels of dopamine release resulted in reduced propagation of stimulus-related activity to frontal areas and a failure to engage persistent activity. Mid-level dopamine release enables distributed persistent activity. D) Timecourses of activity in selected cortical areas. The horizontal bars indicate the timing of cue (red) input to area VI. Activity in early somatosensory areas such as area 3 peaks in response to the stimulus, but quickly decays away after stimulus removal for all levels of dopamine release. In contrast, there is dopamine-dependent persistent activity in area OPRO. E) The pattern of activity at the end of the delay period is highly overlapping following visual and somatosensory working memory tasks. DA, cortical dopamine availability.



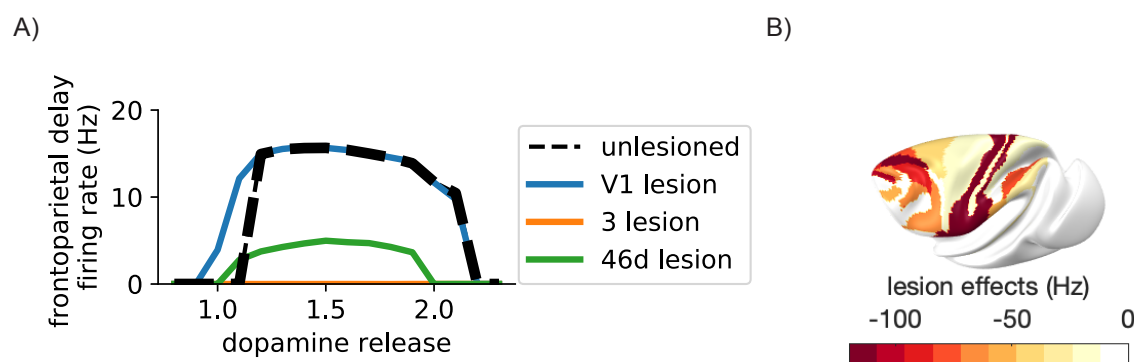

Figure S3: Lesions to visual areas do not disrupt somatosensory working memory. A) Lesions to areas such as 46d and LIP led to reduced delay period firing across for all levels of dopamine release. Lesions to areas 3 and 2 of somatosensory cortex disrupted the ability to perform the somatosensory working memory task. In contrast, lesions to visual areas such as V1 did not significantly affect somatosensory working memory. B) Map showing the severity of lesions to cortical areas on somatosensory working memory. More severe effects are shown in deeper red.

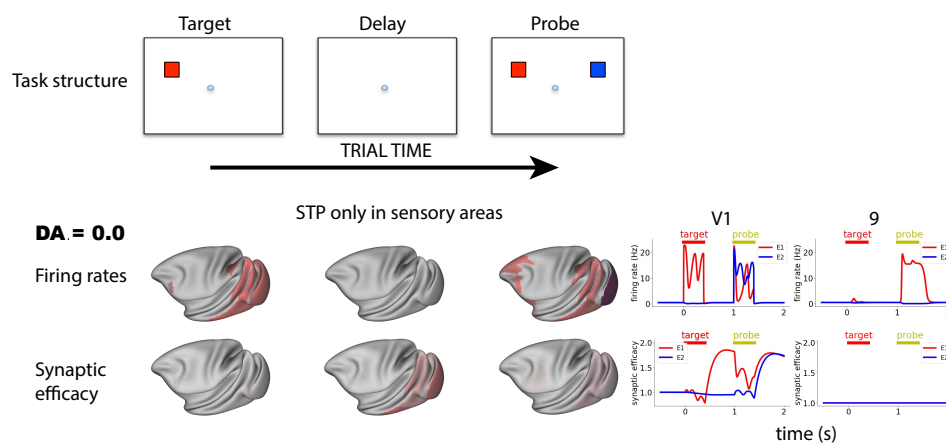

Figure S4: Activity-silent working memory without short-term plasticity in local prefrontal synapses. Reactivation of latent working memory representations was possible upon pinging the system, with short-term plasticity only on connections from neurons in sensory areas.

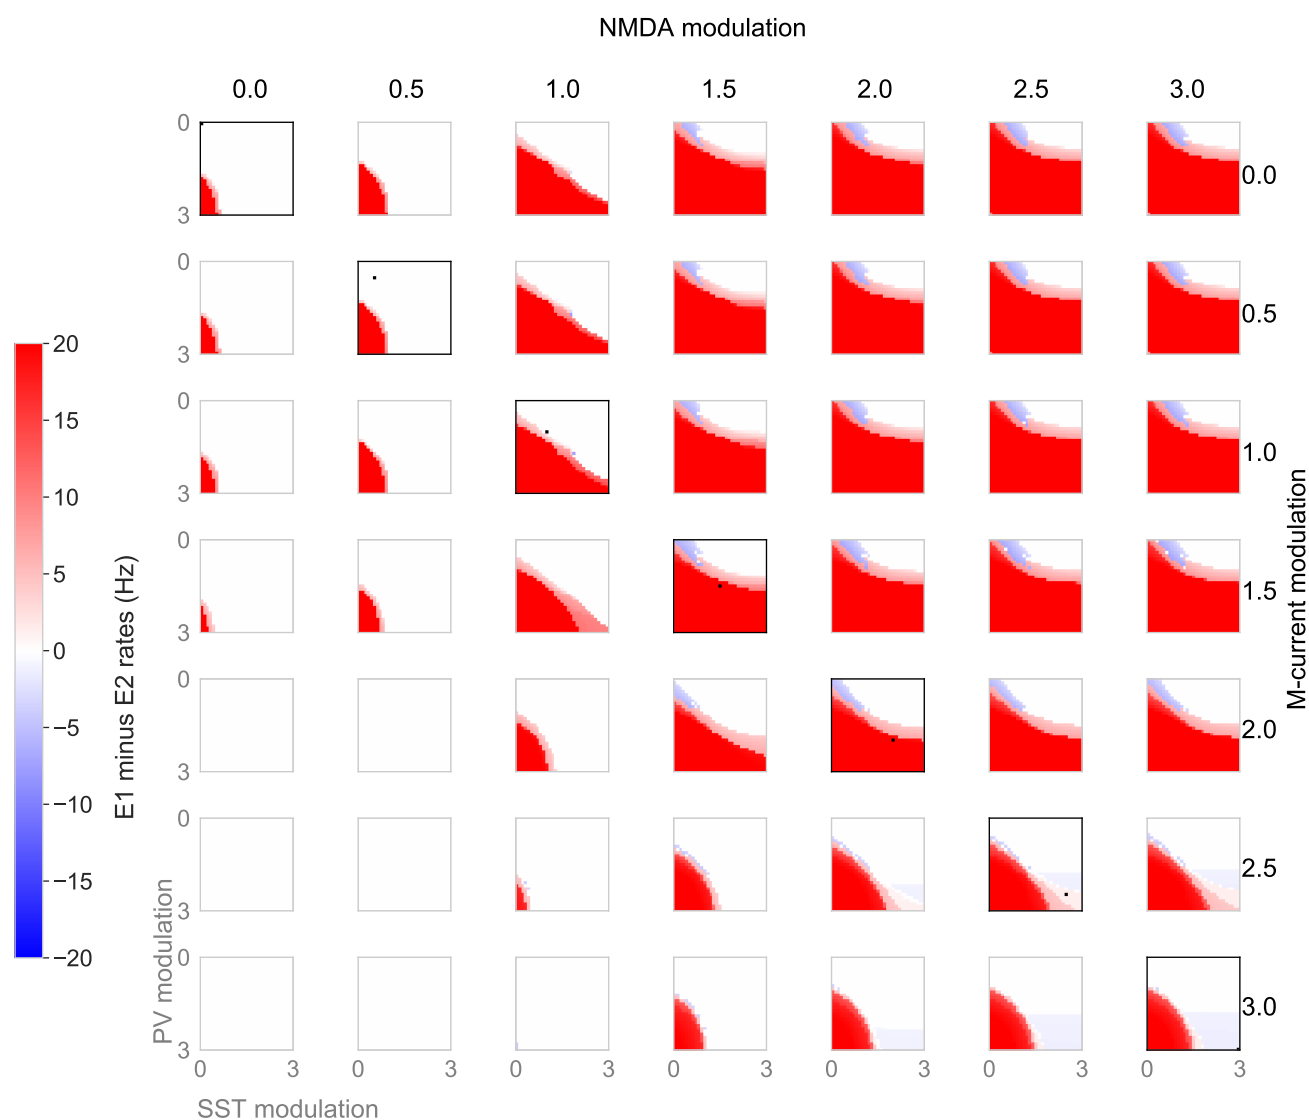

*Figure S5: Distractor-resistance depends on the high dendritic inhibition. We identified the model behaviour for different dopamine levels, across different levels of dendritic and somatic inhibition. Consistently across dopamine levels, higher somatic, and lower dendritic inhibition was associated with distractible working memory (blue). In contrast, lower somatic, and higher somatic inhibition was associated with distractor-resistant working memory (red). High dendritic and high somatic inhibition results in no persistent activity (white). The levels of dendritic and somatic inhibition associated with the standard dopamine modulation used in the rest of the paper marked by a black square. Note that high PV modulation by dopamine results in lower PV inhibition of the soma.*
